# Trends in Citations to Books on Epidemiological and Statistical Methods in the Biomedical Literature

Miquel Porta<sup>1,2\*</sup>, Jan P. Vandenbroucke<sup>3</sup>, John P. A. Ioannidis<sup>4,5</sup>, Sergio Sanz<sup>1</sup>, Esteve Fernandez<sup>6</sup>, Raj Bhopal<sup>7</sup>, Alfredo Morabia<sup>8,9</sup>, Cesar Victora<sup>10</sup>, Tomàs Lopez<sup>1</sup>

**1** Hospital del Mar Institute of Medical Research (IMIM), Barcelona, CIBER de Epidemiología y Salud Pública (CIBERESP), and School of Medicine, Universitat Autònoma de Barcelona, Catalonia, Spain, **2** Department of Epidemiology, School of Public Health, University of North Carolina at Chapel Hill, Chapel Hill, North Carolina, United States of America, **3** Department of Clinical Epidemiology, Leiden University Medical Center, Leiden, The Netherlands, **4** Department of Hygiene and Epidemiology, University of Ioannina School of Medicine, Ioannina, Greece, **5** Stanford Prevention Research Center, Department of Medicine and Department of Health Research and Policy, Stanford University School of Medicine, and Department of Statistics, Stanford University School of Humanities and Sciences, Stanford, California, United States of America, **6** Cancer Prevention and Control Programme, Institut Català d'Oncologia (ICO-IDIBELL), and School of Medicine, Universitat de Barcelona, L'Hospitalet de Llobregat, Barcelona, Catalonia, Spain, **7** Centre for Population Health Sciences, University of Edinburgh, Edinburgh, Scotland, United Kingdom, **8** Mailman School of Public Health, Columbia University, New York, New York, United States of America, **9** School of Earth and Environmental Sciences and Center for the Biology of Natural Systems, Queens College, City University of New York, Flushing, New York, United States of America, **10** Universidade Federal de Pelotas, Pelotas, Brazil

## Abstract

**Background:** There are no analyses of citations to books on epidemiological and statistical methods in the biomedical literature. Such analyses may shed light on how concepts and methods changed while biomedical research evolved. Our aim was to analyze the number and time trends of citations received from biomedical articles by books on epidemiological and statistical methods, and related disciplines.

**Methods and Findings:** The data source was the Web of Science. The study books were published between 1957 and 2010. The first year of publication of the citing articles was 1945. We identified 125 books that received at least 25 citations. Books first published in 1980–1989 had the highest total and median number of citations per year. Nine of the 10 most cited texts focused on statistical methods. Hosmer & Lemeshow's *Applied logistic regression* received the highest number of citations and highest average annual rate. It was followed by books by Fleiss, Armitage, et al., Rothman, et al., and Kalbfleisch and Prentice. Fifth in citations per year was Sackett, et al., *Evidence-based medicine*. The rise of multivariate methods, clinical epidemiology, or nutritional epidemiology was reflected in the citation trends. Educational textbooks, practice-oriented books, books on epidemiological substantive knowledge, and on theory and health policies were much less cited. None of the 25 top-cited books had the theoretical or sociopolitical scope of works by Cochrane, McKeown, Rose, or Morris.

**Conclusions:** Books were mainly cited to reference methods. Books first published in the 1980s continue to be most influential. Older books on theory and policies were rooted in societal and general medical concerns, while the most modern books are almost purely on methods.

**Citation:** Porta M, Vandenbroucke JP, Ioannidis JPA, Sanz S, Fernandez E, et al. (2013) Trends in Citations to Books on Epidemiological and Statistical Methods in the Biomedical Literature. PLoS ONE 8(5): e61837. doi:10.1371/journal.pone.0061837

**Editor:** Alan Hubbard, University of California, Berkeley, United States of America

**Received:** January 22, 2013; **Accepted:** March 10, 2013; **Published:** May 7, 2013

**Copyright:** © 2013 Porta et al. This is an open-access article distributed under the terms of the Creative Commons Attribution License, which permits unrestricted use, distribution, and reproduction in any medium, provided the original author and source are credited.

**Funding:** This work was supported in part by research grants from the Government of Catalonia (2009 SGR 1350 and 2009 SGR 192); CIBER de Epidemiología y Salud Pública (CIBERESP); and RTIC Cáncer (RD06/0020/0089), Instituto de Salud Carlos III, Government of Spain. The funders had no role in study design, data collection and analysis, decision to publish, or preparation of the manuscript.

**Competing Interests:** The authors have declared that no competing interests exist.

\* E-mail: mporta@imim.es

## Introduction

*If one considers the book as the macro unit of thought and the periodical article the micro unit of thought, then...*  
Eugene Garfield (1955) [1]

Academic and professional books are both actors and witnesses of their corresponding disciplines. While some books move the frontiers of ignorance, others harvest and synthesize knowledge that seems established [2–5]. In principle, analyses of citations to books may shed light on how concepts and methods changed in

the course of time whilst a discipline evolved as a field of practice and academic subject; such analyses are also relevant to explore the influence of a discipline on other fields [4–8].

Analyses of citations to scientific books are rare and, to our knowledge, there are no comprehensive analyses of citations to books of epidemiology and biostatistics, nor to sets of books in any other of the health and life sciences [6–10]. The vast majority of citation analyses involve citations to articles [11]. Studies on citations made by books (to other books or to articles) are also uncommon. In this study we will analyze citations to books made by scientific biomedical articles. Analyzing the bibliometric impact of books is also relevant at a time when the very nature of books

and the whole publishing endeavour are experiencing enormous changes.

Analyses of citations to epidemiologic books may complement other analyses on the nature, evolution and endeavours of epidemiology, a particularly integrative science [12,13]; for decades, epidemiology has been useful to integrate knowledge, methods, reasoning and cultural referents from multiple health and social sciences, including medicine and public health. Hence, uses of epidemiologic and statistical reasoning, knowledge, and methods –foremost, uses in biomedical research– are of broad scientific interest. Indeed, today concepts and methods with strong epidemiological roots and properties seem fruitfully applied ‘within’ and ‘outside’ epidemiology [12–15].

As a consequence, there cannot be an exhaustive and fixed list of books on epidemiology and biostatistics. This does not preclude the analysis of an intellectually coherent set of books. Furthermore, since the present study is the first of its kind in epidemiology, a broad perspective is warranted. Therefore, rather than using narrow lists or definitions of what is a book on epidemiology or biostatistics, we will apply a wide, inclusive approach. Specifically, we will aim at including in the study books that have a clear biostatistic or epidemiologic component or dimension, relevant to epidemiology. As we shall see, while all books included are unequivocally on epidemiology or biostatistics, many focus exclusively on biostatistical methods and techniques, and a few others are fundamentally on public health, preventive medicine, clinical epidemiology or other epidemiologic specialties. The Appendix S1 includes a few texts (mostly, essays on health policy and philosophy of medicine) in which epidemiology has a secondary role, but which nevertheless are referents.

The objective of this study was to analyze the number and time trends of citations received from scientific biomedical articles by selected books of epidemiology, biostatistics and related disciplines, including public health and preventive medicine.

## Methods

### Selection of books

Based on academic lists of textbooks [3,4,16], books selected by The James Lind Library [17] and the People’s Epidemiology Library [18], publishers’ catalogues, books cited in other books, and our own teaching and research references, we first searched for citations to over 200 books on epidemiological and statistical methods and concepts. The books initially included were published from 1957 until 2010, and this is the main period of publication covered by the present study; nevertheless, we occasionally expanded the timeframe backwards to assess books published before 1957 that we deemed important texts for reference.

The primary aim was to include books that had a clear biostatistic or epidemiologic component or dimension, relevant to epidemiology and, foremost, to actual uses of epidemiologic methods in research and practice. We accepted books that focus exclusively on biostatistical methods and techniques, but did not consider books on bioinformatics or that focus on mathematical models without emphasising their potential biostatistical application. We also included books on public health, preventive medicine, clinical epidemiology and other epidemiologic specialties. We thus selected books that are pertinent to applied biostatistical and epidemiological methods and techniques; epidemiologic concepts and theory; health services and policies; and substantive epidemiology (e.g., nutritional epidemiology). Books were selected regardless of whether they were aimed at researchers, practitioners, postgraduate students or undergraduates.

If a book received less than 25 citations, it was finally not included in the study; examples of exclusions are given in the Table S1. Books included are listed in the References section in alphabetic order [19–304], except if already cited paragraphs [12,14]. If a book had many editions, only a selection is cited in the References, but we aimed at counting citations to all editions (see Appendix S1).

### Bibliometric analyses

The data source for the study was the Web of Science, produced historically by the Institute for Scientific Information, Inc. (ISI), and in recent years by Thomson – Reuters [305]. The database includes: *a*) the Science Citation Index Expanded (SCI-Expanded), from 1945 to 2011; *b*) the Social Sciences Citation Index, from 1956 to 2011; and *c*) the Arts & Humanities Citation Index, from 1975 to 2011. Thus, while 1945 is the first year of publication of the citing articles, the year of publication of cited books is not restricted by 1945; since articles published from 1945 onwards could cite books published before 1945.

To measure the overall bibliometric impact of each book, we aimed at retrieving all citations received by all editions of the book from the year of publication until 31 December 2011. Thus, our primary measure was the total number of citations received by each book, unadjusted by the number of editions or time since first publication. A second indicator was the average number of citations received by the book per year since publication of the first edition. We also focused on books that received over 1000 citations since publication and books that received an average of more than 40 citations per year since publication. Thus, books published long ago had more time to accumulate citations. Books published in recent decades were *a priori* more likely to receive more than 40 citations per year, since the citing base of articles was larger. Using sampling of papers with random trigrams author searches, we estimated that in the Web of Science the number of papers (and by extrapolation, citations) indexed per year increased approximately 3-fold in the last 3 decades. Finally, we computed an annual citation rate, the number of citations received each year by the selected books at each corresponding time divided by the corresponding number of selected books. To allow for delays in the publication of citing articles, our last search was conducted on February 9, 2012 (always aiming at retrieving citations made by articles published until December 31, 2011). The present study was developed from a minor pilot study conducted in 2006 [16].

Through a ‘cited reference search’, we used combinations of ‘cited author’ and ‘cited work’, the latter referring to the title of a book or to the name of a journal, not to the title of an article. All citations were checked for accuracy as explained in Appendix S1. For each book several possible citation options were searched to allow for different abbreviations and for citation errors. Information on all books was verified against valid information on all editions of the book.

For a given book we included all directly related editions and printings. Citations to each book were searched independently by name of author or editor, and title; all authors or editors (not just the first one) were used in different searches. The data source does not allow to reliably identify chapters of books written by authors other than the book editors [306], unless the title of the book is unique or unambiguous (e.g., *Modern Epidemiology* [250–252], *Oxford Textbook of Public Health* [133–137]). Thus, if the title was unambiguous, the number of citations includes citations to individual chapters not authored by the book editors; if the title of the book was common, we could not include citations registered with the name of the first author of each chapter (when other than the editors), and some citations to chapters not written by the

editors had to be excluded (Appendix S1 and Figure S1). Citing articles were thus identified, and the year of publication of each article was analyzed (through the Web of Science option “analyze results”) to assess time trends in the number of citations to each book.

## Results

### General trends

The 125 books that received 25 citations or more were published between 1913 and 2004 and, therefore, the maximum number of years since publication was 98, and the minimum, 7 (median, 24 years); 100 books (80%) had been published for over 15 years (Table 1). Besides books published in the earlier periods, 46 books (37%) were published in 1980–1989, 35 (28%) in 1990–1999, and 14 (11%) in 2000–2004. We thus see a possible peak of influential books published around 1980–1989; most notably, works by Hosmer & Lemeshow, Rothman et al., Kalbfleisch & Prentice, Breslow & Day, Kleinbaum et al., Rosner, Sackett et al., Schlesselman & Stolley, Hennekens & Buring, Fletcher et al., Bland, Friedman et al., Hulley et al, Feinstein, or Kelsey et al. (Table 2).

All 10 top-cited books had an edition (not necessarily the first) during 1980–1989. This decade also stands out when we analyze the relative proportion of the study books that received over 1000 citations: such proportion peaked at near 15% in 1980–1989, as did the relative proportion of texts that received more than 40 citations per year since publication (Table 1).

The total number of citations received by the 125 books was 183 401, of which 52% were to books first published in 1980–1989. Books first published in this decade also had the highest mean and median number of citations per year since publication (Table 1). The crude number of citations to the selected books increased substantially from 1990 to the mid-1990s, and remained stable thereafter: there were 160 citations in 1970, 869 citations in 1980, 3980 citations in 1990, 7356 citations in 1997, and 8838 in 2008 (Figure 1); in such years the annual citation rate was 12.3, 26.3, 50.4, 68.7 and 70.7 citations/book, respectively.

Among the 50 top-cited books, 15 are completely or strongly on applied biostatistical methods, and the contents of at least a further three is heavily on quantitative methods (18 out of 50 = 36%). At least 33 of such 50 books (two-thirds) have strong methodological contents.

Nine of the top 10 books are general works on statistical or epidemiological methods: 7 of 10, including the top three, are strongly focused on statistics, while two address epidemiological methods as well (4th. and 8th. places, also with strong statistical contents). Ranking 10th. and 15th., we find texts on health measurement (Table 2).

### Influential individual titles

Hosmer & Lemeshow's *Applied logistic regression* [139] is the title that received the highest number of citations and the highest average annual rate since publication. It is followed by Fleiss [87], Armitage et al. [33], Rothman et al. [250], and Kalbfleisch & Prentice [155] (Table 2). None of the previous 5 texts is affected by limitations on retrieving citations to book chapters not authored by the book editors (see Methods). Except for Hosmer & Lemeshow's, whose ranking does not change, the ranking of all other 9 books among the top 10 by total citations changes slightly when we use the average number of citations per year: ranking 2nd. is then Rothman et al., 3rd. is Fleiss, and 4th. is Armitage et al. Fifth in citations per year is Sackett et al. *Evidence-based medicine*. Of books that have been on the market for less than 15 years, only 9 have

**Table 1.** General indicators of the 125 selected books.<sup>a</sup>

| Year of 1st. edition | Number of books N (%) | Books that received >1,000 citations N (%) | Books that received >40 citations per year N (%) | Total citations received <sup>b</sup> |       | Citations per year |        |
|----------------------|-----------------------|--------------------------------------------|--------------------------------------------------|---------------------------------------|-------|--------------------|--------|
|                      |                       |                                            |                                                  | N                                     | (%)   | Mean               | Median |
| 1913–1949            | 3 (2.4)               | 1 (0.8)                                    | 0 (0.0)                                          | 3206                                  | 1.7   | 13.4               | 9.5    |
| 1950–1959            | 2 (1.6)               | 0 (0.0)                                    | 0 (0.0)                                          | 1150                                  | 0.6   | 10.8               | 10.8   |
| 1960–1969            | 6 (4.8)               | 3 (2.4)                                    | 0 (0.0)                                          | 8736                                  | 4.8   | 32.0               | 26.8   |
| 1970–1979            | 19 (15.2)             | 9 (7.2)                                    | 5 (4.0)                                          | 50 739                                | 27.7  | 70.8               | 12.5   |
| 1980–1989            | 46 (36.8)             | 19 (15.2)                                  | 20 (16.0)                                        | 95 555                                | 52.1  | 80.9               | 29.3   |
| 1990–1999            | 35 (28.0)             | 8 (6.4)                                    | 10 (8.0)                                         | 20 412                                | 11.1  | 36.0               | 10.2   |
| 2000–2004            | 14 (11.2)             | 2 (1.6)                                    | 5 (4.0)                                          | 5603                                  | 3.1   | 39.1               | 12.7   |
| Total                | 125 (100)             | 42 (33.6)                                  | 40 (32.0)                                        | 183 401                               | (100) | 57.0               | 12.5   |

<sup>a</sup>All percentages are relative to the 125 books selected for the study because they received at least 25 citations since publication. See also footnotes to Table 2.

<sup>b</sup>Total number of citations received (at any time) by all books first published in each period.

doi:10.1371/journal.pone.0061837.t001

**Table 2.** Number of citations received by books on epidemiology, biostatistics and related fields.\*

| Rank <sup>a</sup> | Author(s) <sup>b</sup>              | Brief title & references <sup>b</sup>                       | Edition, year <sup>c</sup>                                         | Years <sup>d</sup> | Citations (total) <sup>e</sup> | Citations per year <sup>e</sup> |
|-------------------|-------------------------------------|-------------------------------------------------------------|--------------------------------------------------------------------|--------------------|--------------------------------|---------------------------------|
| 1                 | Hosmer, Lemeshow                    | Applied logistic regression [139,140]                       | 1st., 1989<br>2nd., 2000                                           | 22                 | 19 276                         | 876.2                           |
| 2                 | Fleiss                              | Statistical methods for rates and proportions [87–89]       | 1st., 1973<br>2nd., 1981<br>3rd., 2003                             | 38                 | 17 173                         | 447.4                           |
| 3                 | Armitage, Berry, Matthews           | Statistical methods [33–36]                                 | 1st., 1971<br>2nd., 1987<br>3rd., 1994<br>4th., 2002               | 40                 | 16 204                         | 405.1                           |
| 4                 | Rothman, Greenland, Lash            | Modern epidemiology [250–252]                               | 1st., 1986<br>2nd., 1998<br>3rd., 2008                             | 25                 | 12 256                         | 490.2                           |
| 5                 | Kalbfleisch, Prentice               | Statistical analysis of failure time data [155,156]         | 1st., 1980<br>2nd., 2002                                           | 31                 | 8097                           | 261.2                           |
| 6                 | Kleinbaum, Kupper, Muller, Nizam    | Applied regression analysis [163–166]                       | 1st., 1978<br>2nd., 1988<br>3rd., 1998<br>4th., 2007               | 33                 | 7662                           | 232.2                           |
| 7                 | Breslow, Day                        | Statistical methods in cancer research. Vols I & II [59,60] | 1st., 1980<br>2nd., 1987                                           | 31                 | 6584                           | 212.4 <sup>f</sup>              |
| 8                 | Kleinbaum, Kupper, Morgenstern      | Epidemiologic research [167]                                | 1st., 1982                                                         | 29                 | 5167                           | 178.2                           |
| 9                 | Rosner                              | Fundamentals of biostatistics [245–249]                     | 1st., 1982<br>2nd., 1990<br>3rd., 1995<br>4th., 2000<br>5th., 2006 | 29                 | 4612                           | 159.0                           |
| 10                | Streiner, Norman                    | Health measurement scales [273–276]                         | 1st., 1989<br>2nd., 1995<br>3rd., 2003<br>4th., 2008               | 22                 | 4591                           | 208.7                           |
| 11                | Sackett, Richardson, Straus, et al. | Evidence-based medicine [258–260]                           | 1st., 1997<br>2nd., 2000<br>3rd., 2005                             | 14                 | 4081                           | 291.5                           |
| 12                | Sackett, Haynes, Tugwell, Guyatt    | Clinical epidemiology [255–257]                             | 1st., 1985<br>2nd., 1991<br>3rd., 2005                             | 26                 | 4069                           | 156.5                           |
| 13                | Willett                             | Nutritional epidemiology [302,303]                          | 1st., 1990<br>2nd., 1998                                           | 21                 | 3968                           | 189.0                           |
| 14                | Schlesselman, Stolley               | Case-control studies [261]                                  | 1st., 1982                                                         | 29                 | 3512                           | 121.1                           |
| 15                | McDowell, Newell                    | Measuring health [190–192]                                  | 1st., 1987<br>2nd., 1996<br>3rd., 2006                             | 24                 | 2522                           | 105.1                           |
| 16                | Pocock                              | Clinical trials [224,225]                                   | 1st., 1983                                                         | 28                 | 2431                           | 86.8                            |
| 17                | Hill                                | Principles of medical statistics [128–130]                  | <sup>c1</sup> 1st., 1937<br>10th., 1977<br>12th., 1991             | 74                 | 2123                           | 28.7                            |
| 18                | Last                                | Dictionary of epidemiology [12,172–175]                     | 1st., 1983<br>2nd., 1988<br>3rd., 1995<br>4th., 2001<br>5th., 2008 | 28                 | 2112                           | 75.4                            |
| 19                | Rose et al.                         | Cardiovascular survey methods [236–238]                     | 1st., 1968<br>2nd., 1982<br>3rd., 2004                             | 43                 | 2072                           | 48.2                            |
| 20                | Hennekens, Buring                   | Epidemiology in medicine [127]                              | 1st., 1987                                                         | 24                 | 2045                           | 85.2                            |
| 21                | Lilienfeld, Lilienfeld, Stolley     | Foundations of epidemiology [176–178]                       | 1st., 1976<br>2nd., 1980<br>3rd., 1994                             | 35                 | 1947                           | 55.6                            |
| 22                | MacMahon, Pugh, Trichopoulos        | Principles and methods [180,181]                            | 1st., 1960<br>2nd., 1996                                           | 51                 | 1944                           | 38.1                            |

**Table 2. Cont.**

| Rank <sup>a</sup> | Author(s) <sup>b</sup>                 | Brief title & references <sup>b</sup>              | Edition, year <sup>c</sup>                                            | Years <sup>d</sup> | Citations (total) <sup>e</sup> | Citations per year <sup>e</sup> |
|-------------------|----------------------------------------|----------------------------------------------------|-----------------------------------------------------------------------|--------------------|--------------------------------|---------------------------------|
| 23                | Pearl                                  | Causality [221]                                    | 1st., 2000                                                            | 11                 | 1913                           | 173.9                           |
| 24                | Fletcher, Fletcher, Wagner             | Clinical epidemiology [90–93]                      | 1st., 1982<br>2nd., 1988<br>3rd., 1996<br>4th., 2005                  | 29                 | 1732                           | 59.7                            |
| 25                | APHA, Emerson, et al.                  | Communicable diseases [66,67]                      | 17th., 2000<br>19th., 2008                                            | 41                 | 1623                           | 39.6                            |
| 26                | Bland                                  | Introduction medical statistics [56–58]            | 1st., 1987<br>2nd., 1995<br>3rd., 2000                                | 24                 | 1586                           | 66.1                            |
| 27                | Friedman, Furberg, DeMets              | Fundamentals of clinical trials [100–103]          | 1st., 1981<br>2nd., 1985<br>3rd., 1996<br>4th., 2010                  | 30                 | 1498                           | 49.9                            |
| 28                | Hulley, Cummings                       | Clinical research [146,147]                        | 1st., 1988<br>2nd., 2001                                              | 23                 | 1475                           | 64.1                            |
| 29                | Townsend, Davidson                     | Inequalities in health [293]                       | 1st., 1982                                                            | 29                 | 1364                           | 47.0                            |
| 30                | Berkman, Kawachi                       | Social epidemiology [49]                           | 1st., 2000                                                            | 11                 | 1311                           | 119.2                           |
| 31                | Blalock                                | Causal inference in non-experimental research [52] | 1st., 1964                                                            | 47                 | 1269                           | 27.0                            |
| 32                | Cochrane                               | Effectiveness and efficiency [69]                  | 1st., 1972                                                            | 39                 | 1264                           | 32.4                            |
| 33                | Clayton, Hills                         | Statistical models [68]                            | 1st., 1993                                                            | 18                 | 1260                           | 70.0                            |
| 34                | Hosmer                                 | Applied survival analysis [141,142]                | 1st., 1999<br>2nd., 2008                                              | 12                 | 1254                           | 104.5                           |
| 35                | Feinstein                              | Clinical epidemiology [85]                         | 1st., 1985                                                            | 26                 | 1217                           | 46.8                            |
| 36                | Marmot, Wilkinson                      | Social determinants [186,187]                      | 1st., 1999<br>2nd., 2006                                              | 12                 | 1214                           | 101.2                           |
| 37                | Kelsey, Whittemore, Evans, Thompson    | Methods in observational epidemiology [157,158]    | 1st., 1986<br>2nd., 1996                                              | 45                 | 1196                           | 26.6                            |
| 38                | Petitti                                | Meta-analysis [222,223]                            | 1st., 1994<br>2nd., 2000                                              | 17                 | 1125                           | 66.2                            |
| 39                | McKeown                                | The role of medicine [193]                         | 1st., 1976                                                            | 35                 | 1101                           | 31.5                            |
| 40                | Rose                                   | The strategy of preventive medicine [233]          | 1st., 1992                                                            | 19                 | 1066                           | 56.1                            |
| 41                | Schottenfeld, Fraumeni                 | Cancer epidemiology [262–265]                      | 1st., 1975<br>1st., 1982<br>2nd., 1996<br>3rd., 2006                  | 36                 | 1055                           | 29.3                            |
| 42                | Kleinbaum, Klein                       | Logistic regression [168,169]                      | 1st., 1994<br>2nd., 2002                                              | 17                 | 1001                           | 58.9                            |
| 43                | Holland, Detels, Knox, et al.          | Oxford textbook of public health [132–137]         | 1st., 1984<br>2nd., 1991<br>3rd., 1997<br>4th., 2002<br>5th., 2009    | 27                 | 977                            | 36.2                            |
| 44                | Rosenau, Maxcy, Sartwell, Last, et al. | Preventive medicine [236–243]                      | 1st., 1913<br>7th., 1951<br>10th., 1973<br>11th., 1980<br>13th., 1992 | 98                 | 931                            | 9.5 <sup>g</sup>                |
| 45                | Doll, Peto                             | Causes of cancer [73]                              | 1st., 1981                                                            | 30                 | 912                            | 30.4 <sup>h</sup>               |
| 46                | Kahn, Sempos                           | Statistical methods in epidemiology [154]          | 1st., 1989                                                            | 22                 | 901                            | 41.0                            |
| 47                | Sudman, Bradburn, Wansink              | Asking questions [281,282]                         | 1st., 1982<br>2nd., 2004                                              | 29                 | 795                            | 27.4                            |
| 48                | Miettinen                              | Theoretical epidemiology [195]                     | 1st., 1985                                                            | 26                 | 794                            | 30.5                            |
| 49                | Kleinbaum                              | Survival analysis [170,171]                        | 1st., 1997<br>2nd., 2005                                              | 15                 | 783                            | 52.2                            |
| 50                | Mausner, Bahn                          | Epidemiology [188,189]                             | 1st., 1974<br>2nd., 1985                                              | 37                 | 767                            | 20.7                            |

**Table 2. Cont.**

| Rank <sup>a</sup> | Author(s) <sup>b</sup>         | Brief title & references <sup>b</sup>       | Edition, year <sup>c</sup>                                                       | Years <sup>d</sup> | Citations (total) <sup>e</sup> | Citations per year <sup>e</sup> |
|-------------------|--------------------------------|---------------------------------------------|----------------------------------------------------------------------------------|--------------------|--------------------------------|---------------------------------|
| 51                | Meinert                        | Clinical trials [194]                       | 1st., 1986                                                                       | 25                 | 702                            | 28.1                            |
| 52                | Patrick, Erickson              | Health status and health policy [220]       | 1st., 1993                                                                       | 18                 | 680                            | 37.8                            |
| 53                | Feinstein                      | Clinimetrics [86]                           | 1st., 1987                                                                       | 24                 | 650                            | 27.1                            |
| 54                | Szklo, Nieto                   | Epidemiology. Beyond the basics [286]       | 1st., 2000                                                                       | 11                 | 642                            | 58.4                            |
| 55                | Gordis                         | Epidemiology [108–110]                      | 1st., 1996<br>2nd., 2000<br>3rd., 2004                                           | 15                 | 641                            | 42.7                            |
| 56                | Checkoway, Pearce, Kriebel     | Occupational epidemiology [64,65]           | 1st., 1989<br>2nd., 2004                                                         | 22                 | 619                            | 28.1                            |
| 57                | Rothman                        | Epidemiology: an introduction [254]         | 1st., 2002                                                                       | 9                  | 599                            | 66.6                            |
| 58                | Rosen                          | A history of public health [234,235]        | 1st., 1958<br>2nd., 1993                                                         | 53                 | 595                            | 11.2                            |
| 59                | Morris                         | Uses of epidemiology [199–201]              | 1st., 1957<br>2nd., 1964<br>3rd., 1975                                           | 54                 | 555                            | 10.3                            |
| 60                | Khoury, Beaty, Cohen           | Fundamentals of genetic epidemiology [159]  | 1st., 1993                                                                       | 18                 | 533                            | 29.6                            |
| 61                | Susser                         | Causal thinking [283]                       | 1st., 1973                                                                       | 38                 | 475                            | 12.5                            |
| 62                | Adami, Hunter, Trichopoulos    | Textbook of cancer epidemiology [28,29]     | 1st., 2002<br>2nd., 2008                                                         | 9                  | 440                            | 48.9                            |
| 63                | Blalock                        | Causal models in social sciences [53,54]    | 1st., 1971<br>2nd., 1985                                                         | 40                 | 436                            | 10.9                            |
| 64                | Morrison                       | Screening [202,203]                         | 1st., 1985<br>2nd., 1992                                                         | 26                 | 353                            | 13.6                            |
| 65                | Margetts, Nelson               | Nutritional epidemiology [182,183]          | 1st., 1991<br>2nd., 1997                                                         | 20                 | 325                            | 16.3                            |
| 66                | Monson                         | Occupational epidemiology [196,197]         | 1st., 1980<br>2nd., 1990                                                         | 31                 | 297                            | 9.6                             |
| 67                | Bailar, Mosteller, Hoaglin     | Medical uses of statistics [40–42]          | 1st., 1986<br>2nd., 1992<br>3rd., 2009                                           | 25                 | 293                            | 11.7                            |
| 68                | Abramson                       | Survey methods [19–24]                      | 1st., 1974<br>2nd., 1979<br>3rd., 1984<br>4th., 1990<br>5th., 1999<br>6th., 2008 | 37                 | 289                            | 7.8                             |
| 69                | Strom                          | Pharmacoepidemiology [277–280]              | 1st., 1989<br>2nd., 1994<br>3rd., 2000<br>4th., 2005                             | 22                 | 264                            | 12.0                            |
| 70                | Elwood                         | Causal relationships in medicine [78–80]    | 1st., 1988<br>2nd., 1998<br>3rd., 2007                                           | 23                 | 263                            | 11.4                            |
| 71                | Kahn                           | Introduction to epidemiologic methods [153] | 1st., 1983                                                                       | 28                 | 262                            | 8.6                             |
| 72                | Gore, Altman                   | Statistics in practice [111]                | 1st., 1982                                                                       | 29                 | 249                            | 8.6                             |
| 73                | Friedman                       | Primer of epidemiology [95–99]              | 1st., 1974<br>2nd., 1980<br>3rd., 1987<br>4th., 1994<br>5th., 1998               | 37                 | 226                            | 6.1                             |
| 74                | Jensen, et al.                 | Cancer registration [152]                   | 1st., 1991                                                                       | 20                 | 208                            | 10.4                            |
| 75                | Schulte, Perera                | Molecular epidemiology [266]                | 1st., 1993                                                                       | 18                 | 204                            | 11.3                            |
| 76                | Beaglehole, Bonita, Kjellström | Basic epidemiology [48]                     | 1st., 1993<br>2nd., 2006                                                         | 18                 | 190                            | 10.6                            |
| 77                | Robertson                      | Injury epidemiology [230–232]               | 1st., 1992<br>2nd., 1998<br>3rd., 2007                                           | 19                 | 184                            | 9.7                             |

**Table 2. Cont.**

| Rank <sup>a</sup> | Author(s) <sup>b</sup>           | Brief title & references <sup>b</sup>                           | Edition, year <sup>c</sup>                                         | Years <sup>d</sup> | Citations (total) <sup>e</sup> | Citations per year <sup>e</sup> |
|-------------------|----------------------------------|-----------------------------------------------------------------|--------------------------------------------------------------------|--------------------|--------------------------------|---------------------------------|
| 78                | Hulka, Wilcosky, Griffith        | Biological markers in epidemiology [144]                        | 1st., 1990                                                         | 21                 | 184                            | 8.8                             |
| 79                | Teutsch, Churchill               | Principles and practice of public health surveillance [287,288] | 1st., 1994<br>2nd., 2001                                           | 17                 | 173                            | 10.2                            |
| 81                | Khoury, Little, Burke            | Human genome epidemiology [161,162]                             | 1st., 2003<br>2nd., 2010                                           | 8                  | 171                            | 21.4                            |
| 81                | Jekel, Elmore, Katz              | Epidemiology, biostatistics and preventive medicine [148–150]   | 1st., 1996<br>2nd., 2001<br>3rd., 2007                             | 15                 | 163                            | 10.9                            |
| 82                | Murphy                           | The logic of medicine [210,211]                                 | 1st., 1976<br>2nd., 1997                                           | 35                 | 152                            | 4.3                             |
| 83                | Greenwood                        | Epidemics and crowd diseases [118]                              | 1st., 1935                                                         | 76                 | 152                            | 2.0                             |
| 84                | Elliott, et al.                  | Geographical and environmental epidemiology [74]                | 1st., 1992                                                         | 19                 | 151                            | 7.9                             |
| 85                | Greenberg, et al.                | Medical epidemiology [113–116]                                  | 1st., 1993<br>2nd., 1996<br>3rd., 2001<br>4th., 2005               | 18                 | 147                            | 8.2                             |
| 86                | Polgar, Thomas                   | Introduction to research in the health sciences [224]           | 1st., 1988                                                         | 23                 | 139                            | 6.0                             |
| 87                | Elston, Johnson                  | Essentials of biostatistics [75,76]                             | 1st., 1987<br>2nd., 1994                                           | 24                 | 134                            | 5.6                             |
| 88                | Hill                             | Statistical methods [131]                                       | 1st., 1962                                                         | 49                 | 131                            | 2.7                             |
| 89                | Marmot, Elliott                  | Coronary heart disease epidemiology [184,185]                   | 1st., 1992<br>2nd., 2005                                           | 19                 | 128                            | 6.7                             |
| 90                | Barker, Rose                     | Epidemiology in medical practice [43–47]                        | 1st., 1976<br>2nd., 1979<br>3rd., 1984<br>4th., 1990<br>5th., 1998 | 35                 | 128                            | 3.7                             |
| 91                | Fox, Hall, Elveback              | Epidemiology [94]                                               | 1st., 1970                                                         | 41                 | 125                            | 3.0                             |
| 92                | Doll                             | Prevention of cancer [71,72]                                    | 1st., 1967<br>2nd., 2008                                           | 44                 | 124                            | 2.8                             |
| 93                | Friis, Sellers                   | Epidemiology for public health practice [104–107]               | 1st., 1996<br>2nd., 1999<br>3rd., 2004<br>4th., 2009               | 15                 | 115                            | 7.7                             |
| 94                | Brownson, Baker, Leet, Gillespie | Evidence-based public health [61]                               | 1st., 2003                                                         | 8                  | 114                            | 14.3                            |
| 95                | Nelson, Williams, Graham         | Infectious diseases epidemiology [212,213]                      | 1st., 2001<br>2nd., 2006                                           | 10                 | 111                            | 11.1                            |
| 96                | Weiss                            | Clinical epidemiology [297,298]                                 | 1st., 1986<br>2nd., 1996                                           | 25                 | 111                            | 4.4                             |
| 97                | Rothman                          | Causal inference [253]                                          | 1st., 1988                                                         | 23                 | 107                            | 4.7                             |
| 98                | Hartzema, Porta, Tilson, Chan    | Pharmacoepidemiology [123–126]                                  | 1st., 1988<br>2nd., 1991<br>3rd., 1998<br>4th., 2008               | 23                 | 106                            | 4.6                             |
| 99                | Linnet                           | The leukemias [179]                                             | 1st., 1985                                                         | 26                 | 105                            | 4.0                             |
| 100               | Ahlbom, Norell                   | Introduction to modern epidemiology [30,31]                     | 1st., 1984<br>2nd., 1990                                           | 27                 | 97                             | 3.6                             |
| 101               | Coggon, Rose, Barker             | Epidemiology for the uninitiated [70]                           | 1st., 1993                                                         | 18                 | 92                             | 5.1                             |
| 102               | Holland                          | Screening [138]                                                 | 1st., 1990                                                         | 21                 | 87                             | 4.1                             |
| 103               | Gregg                            | Field epidemiology [119–121]                                    | 1st., 1996<br>2nd., 2002<br>3rd., 2008                             | 15                 | 85                             | 5.7                             |
| 104               | Vineis, et al.                   | Metabolic polymorphisms [295]                                   | 1st., 1999                                                         | 12                 | 83                             | 6.9                             |
| 105               | Abramson, Abramson               | Making sense of data [25–27]                                    | 1st., 1988<br>2nd., 1994<br>3rd., 2001                             | 23                 | 83                             | 3.6                             |

**Table 2. Cont.**

| Rank <sup>a</sup> | Author(s) <sup>b</sup>       | Brief title & references <sup>b</sup>                     | Edition, year <sup>c</sup>                                                       | Years <sup>d</sup> | Citations (total) <sup>e</sup> | Citations per year <sup>e</sup> |
|-------------------|------------------------------|-----------------------------------------------------------|----------------------------------------------------------------------------------|--------------------|--------------------------------|---------------------------------|
| 106               | Patrick, Peach               | Disablement [219]                                         | 1st., 1989                                                                       | 22                 | 72                             | 3.3                             |
| 107               | Khoury, Burke, Thomson       | Genetics and public health [160]                          | 1st., 2000                                                                       | 11                 | 69                             | 6.3                             |
| 108               | Aschengrau, Seage            | Essentials of epidemiology [37,38]                        | 1st., 2003<br>2nd., 2008                                                         | 8                  | 67                             | 8.4                             |
| 109               | Elston, Olson, Palmer        | Biostatistical genetics [77]                              | 1st., 2002                                                                       | 9                  | 65                             | 7.2                             |
| 110               | Starfield, et al.            | Effectiveness of medical care [270]                       | 1st., 1985                                                                       | 26                 | 60                             | 2.3                             |
| 111               | Toniolo, et al.              | Biomarkers in cancer epidemiology [292]                   | 1st., 1997                                                                       | 14                 | 58                             | 4.1                             |
| 112               | Morton, Hebel, McCarter      | A study guide to epidemiology and biostatistics [204–209] | 1st., 1979<br>2nd., 1984<br>3rd., 1990<br>4th., 1996<br>5th., 2001<br>6th., 2005 | 32                 | 57                             | 1.8                             |
| 113               | Timmreck                     | Introduction to epidemiology [289–291]                    | 1st., 1994<br>2nd., 1998<br>3rd., 2002                                           | 17                 | 55                             | 3.2                             |
| 114               | Silman, MacFarlane           | Epidemiological studies [268,269]                         | 1st., 1995<br>2nd., 2002                                                         | 16                 | 48                             | 3.0                             |
| 115               | Bhopal                       | Concepts of epidemiology [50,51]                          | 1st., 2002<br>2nd., 2008                                                         | 9                  | 43                             | 4.8                             |
| 116               | Jenicek                      | Epidemiology [151]                                        | 1st., 1995                                                                       | 16                 | 40                             | 2.5                             |
| 117               | Greenland                    | Evolution of epidemiologic ideas [117]                    | 1st., 1987                                                                       | 24                 | 34                             | 1.4                             |
| 118               | Olsen, Trichopoulos, Saracci | Teaching epidemiology [215–217]                           | 1st., 1992<br>2nd., 2001<br>3rd., 2010                                           | 19                 | 32                             | 1.7                             |
| 119               | Morabia                      | History of epidemiologic methods [14]                     | 1st., 2004                                                                       | 7                  | 31                             | 4.4                             |
| 120               | Buck, et al.                 | Readings [62]                                             | 1st., 1988                                                                       | 23                 | 30                             | 1.3                             |
| 121               | Farmer, Miller, Lawrenson    | Lecture notes [81–84]                                     | 1st., 1977<br>2nd., 1983<br>3rd., 1991<br>4th., 1996                             | 34                 | 30                             | 0.9                             |
| 122               | Holford                      | Multivariate methods in epidemiology [132]                | 1st., 2002                                                                       | 9                  | 27                             | 3.0                             |
| 123               | Armenian, Shapiro            | Epidemiology and health services [32]                     | 1st., 1998                                                                       | 13                 | 27                             | 2.1                             |
| 124               | Stolley, Laskey              | Investigating disease patterns [272]                      | 1st., 1995                                                                       | 16                 | 27                             | 1.7                             |
| 125               | White, Henderson             | Epidemiology as a fundamental science [299,300]           | 1st., 1976<br>2nd., 1980                                                         | 35                 | 25                             | 0.7                             |

<sup>a</sup>Based on ISI - Thomson - Reuters Web of Science [305].

<sup>b</sup>Ranked by total number of citations received by all editions in all years (from year of publication until 31 December 2011).

<sup>c</sup>For identification purposes: only the first authors and an abbreviated title are mentioned; the full reference is provided in the list of references.

<sup>d</sup>All editions, except for Hill's *Principles of medical statistics*.<sup>11</sup>

<sup>e</sup>Years elapsed from first edition until the end of 2011.

<sup>f</sup>Simple average from year of publication until 31 December 2011 (all editions).

<sup>g</sup>The data source does not allow to distinguish citations to each volume.

<sup>h</sup>While only the main editions are mentioned in the Table and References, citations to all editions were counted.

<sup>i</sup>The corresponding (identical) journal article [337] received 2369 citations.

doi:10.1371/journal.pone.0061837.t002

had more than 40 citations per year: as just mentioned, Sackett et al. *Evidence-based medicine* (ranking 11th. by total citations and 5th. by citations/year), Pearl (23rd. and 12th., respectively), Berkman & Kawachi (30th. and 16th.), Hosmer's *Survival analysis* (34th. and 18th.), Marmot & Wilkinson (36th. and 19th.), Rothman's *Introduction* (57th. and 25th.), Szklo & Nieto (54th. and 31st.), Kleinbaum's *Survival analysis* (49th. and 34th.), and Adami et al. (62nd. and 36th.).

Figure 2 shows that Hosmer & Lemeshow clearly became the annually most cited book from the mid 1990s on. *Modern epidemiology* also received a large number of citations, at a rate that nowadays remains upward, in contrast with the three other books shown in Figure 2. This view is complemented by Figure 3, where we see the evolution of citations received by *Modern epidemiology* and 4 other books with similar and different features. In such Figures there is no presence of books of the so-called "first



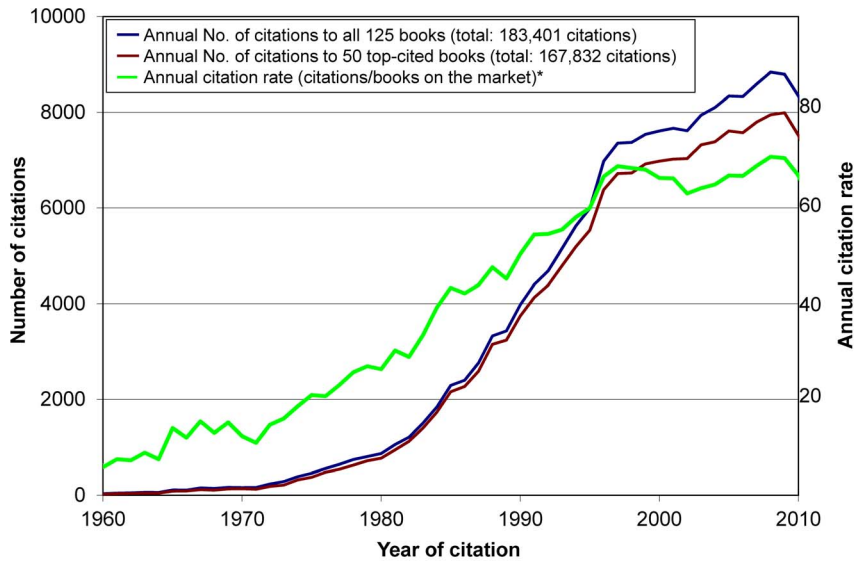

**Figure 1. Total number of citations received by books included in the study each calendar year, and annual citation rate.\*** [Footnote: \*Annual citation rate: Number of citations received each year by the 122 books available in the market at each corresponding time divided by the number of the 122 books in the market at each corresponding time. ]  
doi:10.1371/journal.pone.0061837.g001

and second generations” [2] (e.g., by Greenwood, Hill, Morris, MacMahon & Pugh, Susser, Lilienfeld & Lilienfeld).

Texts on clinical epidemiology and evidence-based medicine were in positions 11th., 12th., 20th., 24th., 28th or 35th. (by total citations) (Table 2). While other texts on clinical epidemiology appeared earlier on, they were seldom cited. The bloom of clinical epidemiology—and later, evidence-based medicine—in the 1980s is apparent in Figure 4; the Figure suggests that the academic influence of clinical epidemiology was largely due to authors from North America. It should be noted that the third edition of Sackett et al. *Clinical epidemiology* [255–257] is actually a different book with different contents from the previous two editions, whereas all

editions of Fletcher et al. *Clinical epidemiology* [90–93] are updated revisions of essentially the same text.

Willett’s book on nutritional epidemiology, also strongly focused on methods, ranked 13th.; it is the first book on that specialty. Figure 5 likely reflects an important part of the surfacing of nutritional epidemiology.

Besides introductory works on clinical epidemiology, introductory textbooks on epidemiology do not appear until positions 21st. (Lilienfeld & Lilienfeld) and 22nd. (MacMahon et al., “the first formal epidemiologic textbook ever published in the United States” [5]); the two texts have remarkably similar figures (Table 2). Figure 6 deliberately contrasts books of the “second generation”

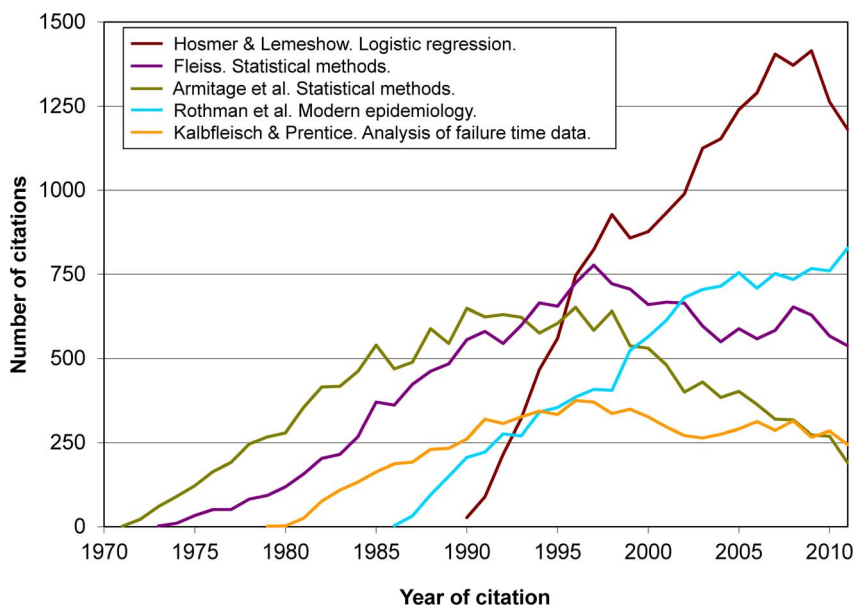

**Figure 2. Evolution over time of citations received by the study 5 top-cited books (total, 73,006 citations).**  
doi:10.1371/journal.pone.0061837.g002

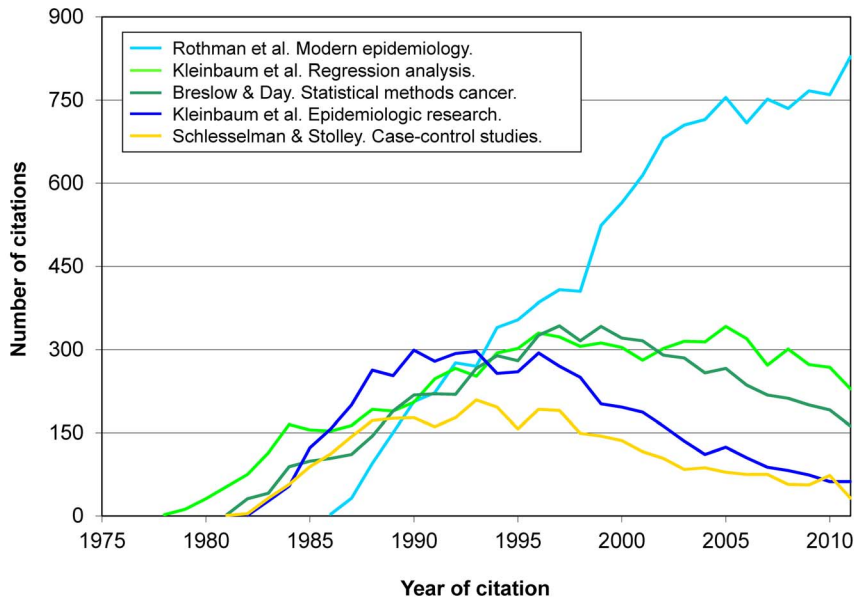

**Figure 3. Evolution over time of citations received by 5 books on epidemiological and statistical methods (total, 35,181 citations).**  
doi:10.1371/journal.pone.0061837.g003

[2] (MacMahon et al., Lilienfeld & Lilienfeld) (which we deem highly influential in the education of many epidemiologists and other health professionals, but rarely considered appropriate as a supporting citation in a scientific article) and of the “third generation” (Breslow & Day, and Schlesselman & Stolley) (commonly used in teaching but also acceptable as a citation in a scientific article). They are followed by what we may call the ‘fourth generation’, i.e., texts by Kleinbaum et al., Rothman et al., or Szklo & Nieto. Figure 6 reflects the higher weight in the citing literature of research methods-oriented books over textbooks primarily used in the classroom.

Results in Table 2 permit to assess the evolution of citations received by different kinds of books on a similar subject. For instance, Figure 7 shows such evolution for the book by Breslow & Day (a text in two volumes which, though sponsored by the International Agency for Research on Cancer, is more centered on methods than on cancer control), Schottenfeld & Fraumeni *Cancer epidemiology* [262–265] (a classic example of a large reference volume synthesizing substantive knowledge on cancer, with relatively less attention to methods), Doll & Peto *Causes of cancer* [73] (a highly influential review, commissioned by the US Congress) [307], and Adami et al. *Textbook of cancer epidemiology*

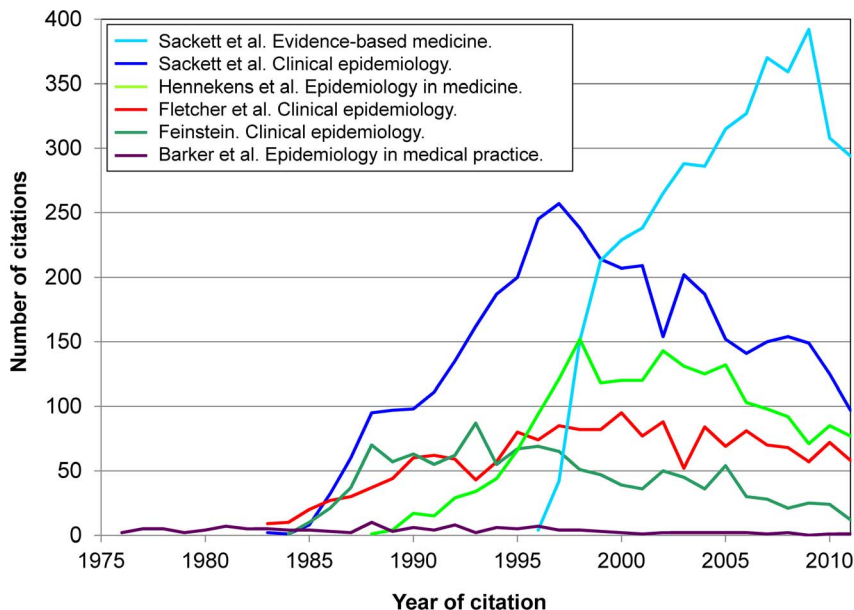

**Figure 4. Citations to 6 books on clinical epidemiology (total, 13,272 citations).**  
doi:10.1371/journal.pone.0061837.g004

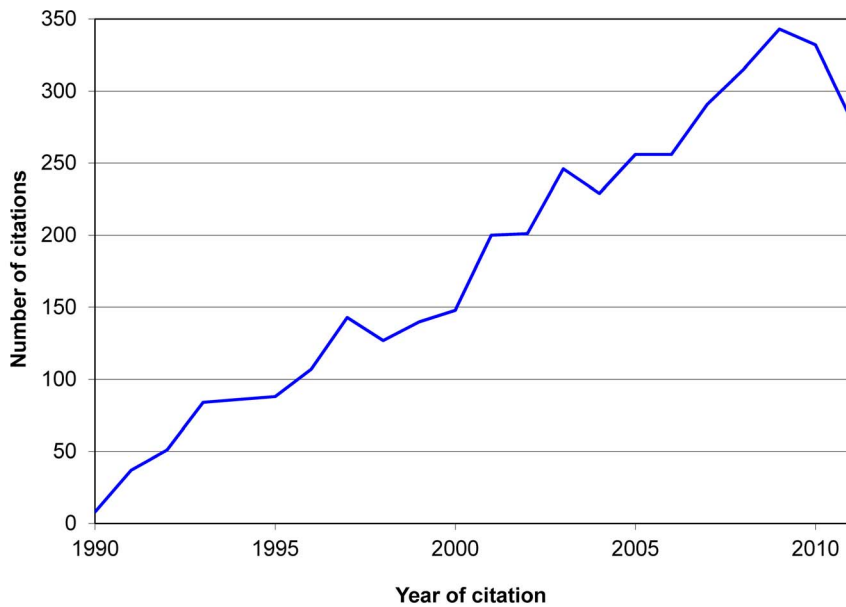

**Figure 5. Evolution of the 3,968 citations received by W. Willett's 'Nutritional epidemiology'.**  
doi:10.1371/journal.pone.0061837.g005

[28,29] (an emerging textbook summarizing substantive knowledge in a smaller format).

Other general introductory texts ranked 26th. (Bland), 50th. (Mausner & Bahn), 55th. (Gordis), 57th. (Rothman), 71st. (Kahn), 72nd. (Gore & Altman), 73rd. (Friedman) or 76th. (Beaglehole et al.). The text by Ahlbom & Norell (100th.) is also an example of a book used in introductory courses and not aiming to be highly cited in the scientific literature. The same applies to Coggon et al. (101st.) [70], a book stemming from a series of articles in a medical journal; also originating in series of articles published in medical journals are books by Hill [128], Bailar & Mosteller [40], and – already mentioned – Gore & Altman [111].

While many of the books included in the study discuss causal inference, books explicitly centered on causality are in positions 23rd. (Pearl), 31st. and 63rd. (Blalock), 61st. (Susser) (“the first book-length treatment of causal reasoning in epidemiology” [308]), and 70th. (Elwood) (Figures S2 and S3). Besides some books on clinical epidemiology, the first book clearly addressed to public health and clinical practice is the American Public Health Association (APHA) *Control of communicable diseases manual* (ranking 25th.). There were three books devoted solely to clinical trials (in positions 16th., 27th. and 51st.) (Table 2, and Figure S4). The top ranking books on social epidemiology were in positions 29th., 30th. and 36th. (time trends are shown in Figure S5).

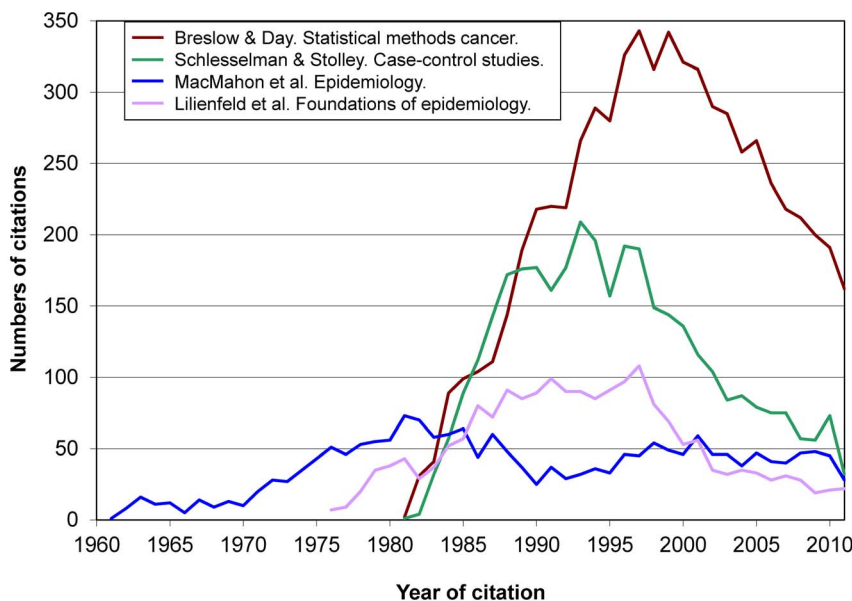

**Figure 6. Citations to 2 books preferentially used in research and to 2 books preferentially used in teaching (total, 13,987 citations).**  
doi:10.1371/journal.pone.0061837.g006

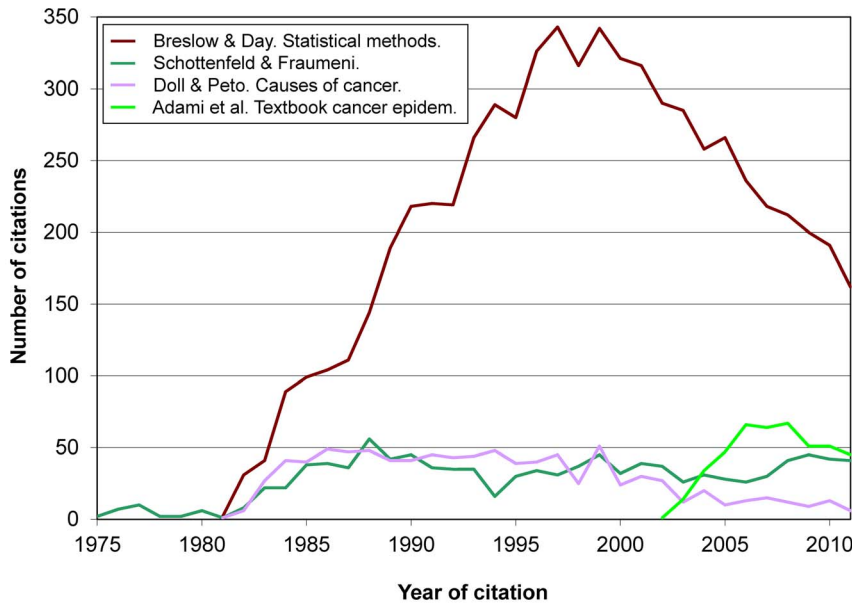

**Figure 7. Citations to 5 books on cancer epidemiology (total, 8,991 citations).**  
doi:10.1371/journal.pone.0061837.g007

None of the 25 top-cited books has the theoretical, conceptual, historical or sociopolitical approach of works by Cochrane (32nd.) [69], McKeown (39th.) [193], Rose (40th.) [233], Morris (59th.) [199], or Murphy (82nd.) [210] (Figure 8). Figures for the books by Cochrane, McKeown, and Rose (about 1000 total citations each, and 30–60 citations/year) are similar to figures for popular texts outside epidemiology by Kleinman (*The illness narratives*) [309], Fuchs (*Who shall live?*) [310], or Knowles (*Doing better and feeling worse*) [311] (Appendix S1, section 2).

The most cited books on historical aspects of epidemiology and public health were Rosen's (58th., after 53 years since first publication; average of 11 citations/year) [234] and Morabia's

(119th. after 7 years; 4 citations/year) [14]. Some of the extensive textbooks (e.g., on cancer epidemiology [262–265], public health [133–137], and preventive medicine [236–244]) were in positions 41st., 43rd. and 44th., respectively. Their figures are particularly affected by current limitations on retrieving citations to book chapters not authored by book editors. Other texts on substantive specialties were in positions 56th. and 66th. (occupational epidemiology), 60th. (genetic epidemiology), 62nd. (cancer epidemiology), 64th. and 102nd. (screening), 65th. (nutritional epidemiology), 69th. (pharmacoepidemiology) or 77th. (injury epidemiology). Citations to the text on cardiovascular survey methods by Rose et al. [236] were estimated to be 2072 (ranking 19th.), and to

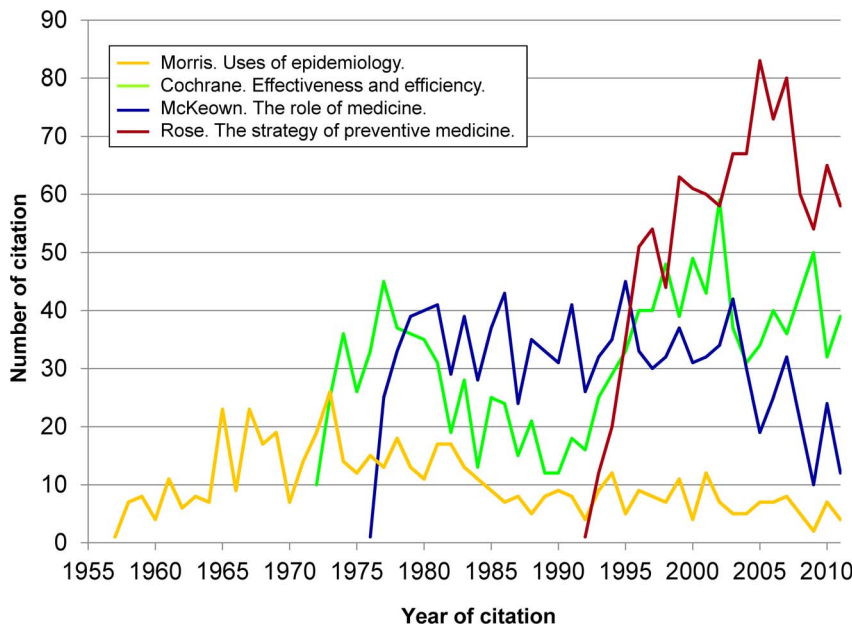

**Figure 8. Citations to 4 books on concepts, theory and policies (total, 3,986 citations).**  
doi:10.1371/journal.pone.0061837.g008

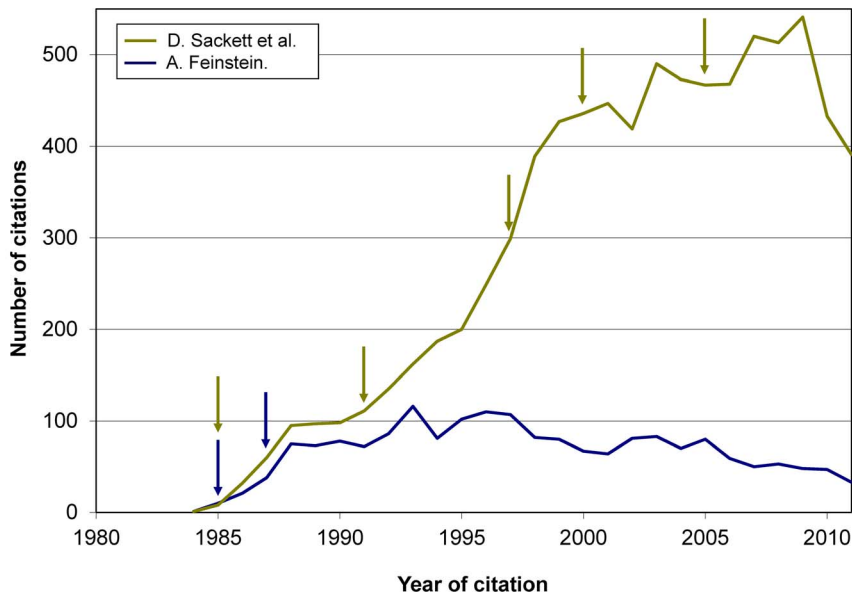

**Figure 9. Citations to 2 books by D. Sackett et al. (8,150 citations) and 2 books by A. Feinstein (1,867 citations).** [ Footnote: Arrows show the year of publication of all editions of each book. ]  
doi:10.1371/journal.pone.0061837.g009

the book on coronary heart disease by Marmot and Elliott [184], 128 (89th). Six texts on molecular and genetic epidemiology ranked 75th. (Schulte & Perera), 78th. (Hulka et al.), 80th. and 107th. (Khoury et al.), 104th. (Vineis et al.), 109th. (Elston et al.), and 111th. (Toniolo et al.). The only book on meta-analysis in Table 2 is Pettiti's (38th., with over 1100 citations).

#### Other analyses and comparisons

The study aims did not include to assess the scholarly performance or influence of an author. It will hence suffice to illustrate how citations to books may complement other analyses

on such performance. For instance, Figure S5 may add to existing views on the influence of the two books by H. Blalock selected for the study: citations peaked in the 1970s, and were still significant in subsequent decades. Another example: *a priori* both A. Feinstein and D. Sackett had a strong influence on clinical epidemiology and the methodology of clinical research; yet, a complementary perspective is gained when looking at the citations during the past 25 years to the 2 most cited books by Feinstein (1867 citations) and 2 books by Sackett et al. (8148 citations) (Figure 9). The evolution over time of the bibliographic impact of some books is also illustrated by the two graphs contrasting trends in citations

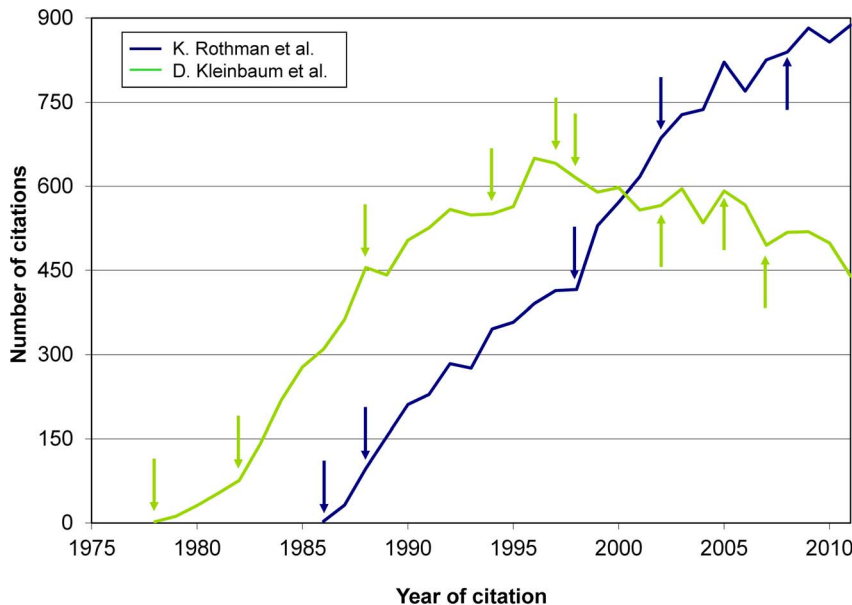

**Figure 10. Citations to 3 books by K. Rothman et al. (12,962 citations) and 4 books by D. Kleinbaum et al. (14,613 citations).** [Footnote: Arrows show the year of publication of all editions of each book. ]  
doi:10.1371/journal.pone.0061837.g010

received by 3 books by K. Rothman et al. (12 962 citations) and 4 books by D. Kleinbaum et al. (14 613 citations) (Figure 10). Other examples are given in Figures S6, S7, S8, S9, S10.

## Discussion

The most prominent pattern in our findings was that the books were mainly cited to reference methods and statistical techniques. The number of citations was larger for books that provide unique sources for (general or specific) methods used in biomedical research papers than for books that innovated in theory, discuss concepts or are preferentially used in teaching. Nine of the 10 most cited texts focused on widely used statistical methods. Some books that have likely been influential—scientifically, theoretically, educationally—in biomedical research or health policy were not highly cited; notable examples include texts by Hill [128], Susser [283], Rose [233], Morris [199], Cochrane [69], or McKeown [193]. Their lower citation figures may partly be due to earlier publication, when all works received less citations because a lower number of articles was published than later on. For instance, Hill's books ranked 17th. [128–130] and 88th. [131] (Table 2); the first book [128–130] was first published in 1937, decades ahead of all texts in the first 40 positions (Figure S6). Older books on theory and policies were rooted in societal and general medical concerns, while the most modern books are almost purely on methods, particularly statistical methods.

By study design, 1945 was the first year of publication of the citing articles; yet, plenty of books on statistics and epidemiology existed before 1945: several books by Major Greenwood (1880–1949) (e.g., his major opus, *Epidemics and Crowd Diseases*) [118]; Woods and Russels book on teaching statistics, which preceded A.B. Hill's; the *Epidemiologic Essays* by Crookshank from 1930; *Epidemiology Old and New*, by Hamer, from 1928; or *The Natural History of Disease*, by Ryle, of 1948, which inspired countless public health professionals [14,15]. So, while we had to stick to a relatively limited time-frame we could also make some comparisons with a few selected classics, including the 3 books published between 1913 and 1949 (Table 1) [118,128,236].

The lower citation figures of books on concepts and policies than of books on methods do not necessarily mean that the citing literature pays less attention to theoretical than to methodological issues: such figures may reflect that authors of articles tend to take basic ideas and concepts for granted, as part of the core or background knowledge of most readers, and therefore not needing to be referenced [2,4,8,13]. Citation frequency is only one and modest proxy for influence [1]. A main reason why books on biostatistics top the list may be that they provide convenient citations for statistical techniques widely used in biomedical research. Most biomedical journals request such citations. An important issue is also that findings must be replicable and, therefore, authors cite methods in detail.

It was beyond the scope of the study to register: *a*) whether citations were to a single technique explained in a specific part of the cited book or a generic citation; *b*) who was citing (e.g., what epidemiologic or clinical specialties, substantive areas, academic groups); or *c*) the appropriateness of the citation. As citations to articles [1,13,312–315], citations to books may be shaped by convenience and habit rather than by a genuine need for scientific reference. Many citations to articles are non-specific, not-justified, or wrong [316]. We are not aware of similar studies on book citations, but we suspect that these problems may also be common with citations to books.

The total citing base (over 20 millions of articles with over half a billion citations) [317–319] certainly includes many more empir-

ical studies (which require methodological and technical citations) than articles on theoretical and conceptual issues. However, a key question is whether current practices of referencing do justice to the needs of science. For instance, logistic regression has many variants and implementations; it is important that a research paper explains exactly what was done in the model selection, building, analysis, and validation in the specific application. If instead the paper provides no information on these issues, but just a citation to a book, then science is not well served. Future studies could assess how often the citation also included reference to specific pages or chapters in the book, and whether the citation was specific or just to the whole book.

Future research could use a random sample of the citing articles, their citations to the relevant books, and the 3 factors mentioned above; e.g., see the appropriateness and specificity of the citations, and whether they act as an alibi for not mentioning important methodological details. Such study will need retrieving and data extracting the articles; so, it will have to be limited to a few hundred references, to examine the sentence and context where the reference appears. A future study could also identify influential books that we may have overlooked, use other reliable data sources to measure citations received by books, or obtain data on annual book sales, which could be compared to citation data.

Books primarily meant for students, some of which have likely been highly sold and effective in classrooms—and most influential in coalescing epidemiologic thinking—collected relatively less citations. Important examples include books by Barker et al. [43], MacMahon et al. [180], the Lilienfelds [176], Gordis [108], or Szklo & Nieto [286]. Being used in research is not the primary purpose of such textbooks [2,3]. Knowledge sifted into a textbook has become normal, background, foundational knowledge [4]; there is no need to reference the material, even though it may be of great importance. A rather different case is a book not just addressed to students, but also to practicing physicians: Sackett's et al. *Evidence-based medicine* [258,259], which gathered more than 4000 citations. An analysis of the development of professional and scientific movements as evidence-based medicine could use and expand some of the study findings [12,14,320,321]. It would in turn provide new insights into the actual influence of some books; e.g., Cochrane's [69] and Sackett's [258,259] roles in the creation of the Cochrane Collaboration and the UK National Institute for Health and Clinical Excellence (NICE) [8].

Analyzing citations received by books of epidemiology published over the last 50 years is also a way of tracing the history of the discipline and, to a lesser extent, of biomedical research. Citations contribute to analyze the evolution of the *corpus* of methods and concepts used by epidemiology and by the disciplines with which epidemiology interacts [2,8,12–15,322,323]. The rise of multivariate methods is a relevant example; it clearly explains a large portion of the citations made by papers published in the 1980s. Such methods were then not yet 'normal science' [4] in epidemiological and clinical research, and were hence in need of referencing.

The decade 1980–1989 stood out as the period in which more highly-cited books were published. Although we ignore the total number of books on epidemiology and biostatistics published in each period, missing books are unlikely to be that influential so as to change this finding. Overall, other than a few dozen highly-cited books, most books had limited or minimal citation impact. Books published in recent years do not seem to have the influence of textbooks published for the first time in the 1980s. Moreover, the total annual citations to books have been rather steady in the last 15 years, or even declining for many specific texts. Given the large increase in the annual number of citations registered in the

Web of Science, the relative citation influence of the study books is probably decreasing sharply, when seen as a proportion of total citations. The total number of citations to the study books (some 183 000 over half a century) probably represents a small fraction of the total citations to the epidemiological and statistical literature, which we estimate to be several million among the over half a billion citations indexed by the Web of Science. Even the few highly-cited books seem to have lost their relative impact in the last 2 decades, because between 1980 and 2011 the number of citing articles (and, correspondingly, citations) increased several-fold. It would next be necessary to perform some adjustment of the citation counts for the total number of citations each year. A comparison with books from other disciplines would then also be meaningful. In spite of its limitations (e.g., choice of citing journals, focus on research-oriented, largely Anglo-Saxon journals) the study data source has long enabled relevant analyses [1,6,312–315,324].

We are not aware of any typology of books that could be useful for the present study. Although it would have been possible to use narrower definitions of what is a book on epidemiology and biostatistics, we chose a wide and inclusive approach, which yields a broad perspective and enables a richer set of comparisons; it also allows readers to conduct other, more focused comparisons. The inclusive approach seems particularly appropriate at a time when no other analyses are yet available.

In spite of the study limitations, we think that just comparing the number and trends of citations to the books that we identified is of interest. The uses of books and their true impact on research and professional practices are questions that often seem to escape analysis. Yet books comprise an important part of scientific production, and evaluations of such production would benefit from considering books along scientific articles. Several projects are under development to register citations to books [11,325,326]. However, none has at present the scope in time and the qualitative features of the present study. Analyses of citations to books are just one approach to analyses of uses of books. An additional task for future research would be to analyze the relative importance of books and articles in the exercise of scientific leadership and social influence by selected authors. An example is shown in Figure S10, which shows that the increase in the number of citations to the book on logistic regression by Hosmer & Lemeshow did not come at the expense of the highly cited article by Mantel & Haenszel [327].

Several influential authors wrote more than one or two books. In the case of M. Susser, for instance, his *Sociology in medicine* [328] has accumulated over 300 citations. To value Susser's oeuvre it is thus necessary to assess several other books of his [283,308,329–331]. J. Last, D. Sackett, O. Miettinen, J. Morris, W. Holland, D. Kleinbaum, A. Feinstein, K. Rothman, M. Khoury, H. Blalock, G. Friedman or J. Abramson are other –very different, obviously– examples of authors with more than one influential book [3,4,5,14,15,323,332,333]. Some books on research methods were less cited than articles on the same methods; for instance, some papers by Hill [334] or Miettinen [335] have each accumulated over 2400 and 1500 citations, respectively [6]. However, seminal papers published long ago received comparatively few citations; for instance, a paper by Jerome Cornfield [336], published over 60 years ago, received less than 450 citations. The review on the causes of cancer by Doll & Peto [307] provides a telling contrast between citations received by the book [73] (about 900 citations) and the –identical– journal article [337] (some 2300 citations); the case illustrates the need to exert caution when dealing with different formats and vehicles of scientific communication, an issue that is getting ever more complex with digital formats and the

Internet [11,338]. Several other articles by Doll & Peto have each received over 1500 citations. The most cited paper by Willett [339] has received some 2000 citations, about half than his book [302]. But some sets of papers by him and other authors are, together, more cited than the reference book by the same author(s). The most cited papers by Cochrane [340,341] received some 500 citations, less than half his book [69]. The top-cited paper by Rose [342] received some 1000 citations, similar to his book [233]; and again, several other papers of his have been highly cited. All articles coauthored by K. J. Rothman received over 12400 citations, a similar amount than *Modern epidemiology* [250–252]. Just two of several books by David G. Kleinbaum combined –*Applied regression analysis* [163–166] and *Epidemiologic research* [167]– received over 17000 citations (Table 2), whereas his articles have some 3000 citations.

To conclude, results may reflect a considerably positive influence of epidemiologic and statistical science on biomedical research [139,140,199–201]. On the other hand, results on the smaller number of citations received by theoretical and policy-oriented books cannot discern whether the influence was weaker on the ideas and policies that so much affect the health and wellbeing of citizens.

## Supporting Information

### Appendix S1 Details on Materials and Methods. (DOCX)

### Table S1 Examples of books that received less than 25 citations. (DOCX)

### Figure S1 Two examples of books whose titles were recorded in different ways in the Web of Science, the *Oxford Textbook of Public Health and Modern Epidemiology*. (TIFF)

### Figure S2 Citations to 4 books on causality (total, 2,529 citations). (TIF)

### Figure S3 Citations to 2 books by H. Blalock (1,705 citations). (TIF)

### Figure S4 Citations to 3 books on clinical trials: S.J. Pocock (2,421 citations), L.M. Friedman et al. (1,498 citations), and C. Meinert (703 citations). (TIF)

### Figure S5 Citations to 3 books on social epidemiology: Berkman & Kawachi (1,311 citations), Marmot & Wilkinson (1,214 citations) and Townsend & Davidson (1,364 citations). (TIF)

### Figure S6 Evolution over time of the 2,123 citations received by A. B. Hill's 'Principles of medical statistics'. (TIF)

### Figure S7 Evolution over time of the 475 citations received by Susser's 'Causal thinking in the health sciences'. (TIF)

### Figure S8 Evolution over time of the 733 citations received by 3 books by M. Khoury. (TIF)

**Figure S9 Citations to 2 books on occupational epidemiology: H. Checkoway et al. (619 citations) and R.R. Monson et al. (297 citations).**

(TIF)

**Figure S10 Trends of citations to the book by Hosmer & Lemeshow, and to the article by Mantel & Haenszel.**

(TIF)

## Acknowledgments

The authors gratefully acknowledge technical assistance from José Pumarega, Magda Gasull, and Yolanda Rovira.

## References

- Garfield E (1955) Citation indexes for science. A new dimension in documentation through association of ideas. *Science* 122: 108–111.
- Zhang FF, Michaels DC, Mathema B, Kauchali S, Chatterjee A, et al. (2004) Evolution of epidemiologic methods and concepts in selected textbooks of the 20th century. *Soz Praventivmed* 49: 97–104.
- Bhopal R (1997) Which book? A comparative review of 25 introductory epidemiology textbooks. *J Epidemiol Community Health* 51: 612–622.
- Bhopal R (1999) Paradigms in epidemiology textbooks: In the footsteps of Thomas Kuhn. *Am J Public Health* 89: 1162–1165.
- Krieger N (1994) Epidemiology and the web of causation: has anyone seen the spider? *Soc Sci Med* 39: 887–903.
- Gläser J (2004) Why are the most influential books in Australian sociology not necessarily the most highly cited ones? *J Sociol* 40: 261–282.
- Porta M, Fernandez E, Bolúmar F (2006) The “bibliographic impact factor” and the still uncharted sociology of epidemiology. *Int J Epidemiol* 35: 1130–1135.
- Álvarez-Dardet C, Ruiz MT (1993) Thomas McKeown and Archibald Cochrane: a journey through the diffusion of their ideas. *BMJ* 306: 1252–1255.
- Nederhof AJ, van Leeuwen TN, van Raan AFJ (2010) Highly cited non-journal publications in political science, economics and psychology: a first exploration. *Scientometrics* 83: 363–374.
- Astrom F (2011) Comparing citation patterns in entrepreneurship research articles in subject handbooks and Web of Science journals. In: Noyons E, Ngulube P, Leta J, editors. *Proceedings of the 13th Conference of the International Society for Scientometrics and Informetrics (ISSI) (Durban, South Africa, July 4–7, 2011)*, Vols. 1 and 2. *Proceedings of the International Conference on Scientometrics and Informetrics*. pp. 89–96.
- Kousha K, Thelwall M, Rezaei S (2011) Assessing the citation impact of books: the role of Google Books, Google Scholar, and Scopus. *J Am Soc Informat Sci Technol* 62: 2147–2164.
- Porta M. (2008) *A dictionary of epidemiology*, 5th edition. New York: Oxford University Press.
- Leydesdorff L, Amsterdamska O (1990) Dimensions of citation analysis. *Sci Technol Human Values* 15: 305–335.
- Morabia A (2004) *A history of epidemiologic methods and concepts*. Basel: Birkhäuser/Springer.
- Amsterdamska O (2005) Demarcating epidemiology. *Sci Technol Human Values* 30: 17–51.
- Porta M, Fernandez E, Puigdomènech E (2006) Citations received by books: an approach to the influence of epidemiologic thought within the academic communities? *Rev Saude Pública* 40 (Supl): 50–56.
- The James Lind Library. Available: <http://www.jameslindlibrary.org/> Accessed 20 March 2013.
- People's Epidemiology Library. Available: <http://www.epidemiology.ch/history/PeopleEpidemiologyLibrary.html> Accessed 20 March 2013.
- Abramson JH (1974) *Survey methods in community medicine*, 1st edition. London: Churchill Livingstone.
- Abramson JH (1979) *Survey methods in community medicine*, 2nd edition. London: Churchill Livingstone.
- Abramson JH (1984) *Survey methods in community medicine*, 3rd edition. London: Churchill Livingstone.
- Abramson JH (1990) *Survey methods in community medicine*, 4th edition. London: Churchill Livingstone.
- Abramson JH (1999) *Survey methods in community medicine*, 5th edition. London: Churchill Livingstone.
- Abramson JH, Abromson ZH (2008) *Research methods in community medicine*, 6th edition. Chichester, West Sussex: John Wiley and Sons.
- Abramson JH (1988) *Making sense of data. A self-instruction manual of the interpretation of epidemiological data*. New York: Oxford University Press.
- Abramson JH (1994) *Making sense of data. A self-instruction manual of the interpretation of epidemiological data*, 2nd edition. New York: Oxford University Press.
- Abramson JH, Abramson ZH (2001) *Making sense of data. A self-instruction manual of the interpretation of epidemiological data*, 3rd edition. New York: Oxford University Press.
- Adami HO, Hunter D, Trichopoulos D, eds. (2002) *Textbook of cancer epidemiology*. New York: Oxford University Press.
- Adami HO, Hunter D, Trichopoulos D, eds. (2008) *Textbook of cancer epidemiology*, 2nd ed. New York: Oxford University Press.
- Ahlbom A, Norell S (1984) *Introduction to modern epidemiology*, 1st. ed. Chestnut Hill, MA: Epidemiology Resources.
- Ahlbom A, Norell S (1990) *Introduction to modern epidemiology*, 2nd ed. Chestnut Hill, MA: Epidemiology Resources.
- Armenian HK, Shapiro S (1998) *Epidemiology and health services*. New York: Oxford University Press.
- Armitage P (1971) *Statistical methods in medical research*, 1st. ed. Oxford: Blackwell.
- Armitage P, Berry G (1987) *Statistical methods in medical research*, 2nd. ed. Oxford: Blackwell.
- Armitage P, Berry G (1994) *Statistical methods in medical research*, 3rd. ed. Oxford: Blackwell.
- Armitage P, Berry G, Matthews JNS (2002) *Statistical methods in medical research*, 4th. ed.: Oxford: Blackwell.
- Aschengrau A, Seage GR (2003) *Essentials of epidemiology in public health*. Sudbury: Jones & Bartlett.
- Aschengrau A, Seage GR (2008) *Essentials of epidemiology in public health*, 2nd ed. Sudbury: Jones & Bartlett.
- Ashton J, ed. (1994) *The epidemiological imagination: A reader*. Philadelphia, PA: Open University Press.
- Bailar JC, Mosteller F, eds. (1986) *Medical uses of statistics*, 1st. ed. Waltham, MA: New England Journal of Medicine Books.
- Bailar JC, Mosteller F, eds. (1992) *Medical uses of statistics*, 2nd. ed. Waltham, MA: New England Journal of Medicine Books.
- Bailar JC, Hoaglin DC, eds. (2009) *Medical uses of statistics*, 3rd. ed. Hoboken, NJ: John Wiley & Sons.
- Barker DJP, Rose GA (1976) *Epidemiology in medical practice*, 1st. ed. Edinburgh: Churchill Livingstone.
- Barker DJP, Rose GA (1979) *Epidemiology in medical practice*, 2nd. ed. Edinburgh: Churchill Livingstone.
- Barker DJP, Rose GA (1984) *Epidemiology in medical practice*, 3rd. ed. Edinburgh: Churchill Livingstone.
- Barker DJP, Rose GA (1990) *Epidemiology in medical practice*, 4th. ed. Edinburgh: Churchill Livingstone.
- Barker DJP, Cooper C, Rose GA (1998) *Epidemiology in medical practice*, 5th. ed. Edinburgh: Churchill Livingstone.
- Beaglehole R, Bonita R, Kjellström T (1993) *Basic epidemiology*. Geneva: World Health Organization.
- Berkman LF, Kawachi I (2000) *Social epidemiology*. New York: Oxford University Press.
- Bhopal R (2002) *Concepts of epidemiology. An integrated introduction to the ideas, theories, principles and methods of epidemiology*. New York: Oxford University Press.
- Bhopal R (2008) *Concepts of epidemiology. An integrated introduction to the ideas, theories, principles and methods of epidemiology*, 2nd. ed. New York: Oxford University Press.
- Blalock HM (1964) *Causal inference in non-experimental research*. Chapel Hill, NC: University of North Carolina Press.
- Blalock HM Jr, ed. (1971) *Causal models in the social sciences*, 1st. ed. New York: Aldine.
- Blalock HM Jr, ed. (1985) *Causal models in the social sciences*, 2nd. ed. Chicago: Aldine.
- Blalock HM Jr, ed. (1985) *Causal models in panel and experimental designs*. New York: Aldine.
- Bland M (1987) *An introduction to medical statistics*, 1st. ed. Oxford: Oxford University Press.
- Bland M (1995) *An introduction to medical statistics*, 2nd. ed. Oxford: Oxford University Press.
- Bland M (2000) *An introduction to medical statistics*, 3rd. ed. Oxford: Oxford University Press.

## Author Contributions

Conceived and designed the experiments: MP. Performed the experiments: MP SS TL. Analyzed the data: TL SS MP. Contributed reagents/materials/analysis tools: MP JPAI JPV SS TL. Wrote the paper: MP JPV JPAI EF RB AM CV TL SS. Are aware of, and accept responsibility for, the manuscript; read and approved the present version of the article; and made a significant intellectual contribution to the research and gave permission to submit the manuscript for possible publication: MP JPV JPAI SS EF RP AM CV TL.



59. Breslow NE, Day NE (1980) *Statistical methods in cancer research. Vol I: The analysis of case-control studies*. Lyon: IARC Scientific Publications.
60. Breslow NE, Day NE (1987) *Statistical methods in cancer research. Vol II: The analysis of cohort studies*. Lyon: IARC Scientific Publications.
61. Brownson RC, Baker E, Leet TL, Gillespie KN (2002) *Evidence-based public health*. New York: Oxford University Press.
62. Buck C, Llopis A, Nájera E, Terris M, eds. (1988) *The challenge of epidemiology: Issues and selected readings*. Washington, DC: PanAmerican Health Organization.
63. Carrington M, Hoelzel R (2001) *Molecular epidemiology*. New York: Oxford University Press.
64. Checkoway H, Pearce N, Crawford-Brown DJ (1989) *Research methods in occupational epidemiology*, 1st ed. New York: Oxford University Press.
65. Checkoway H, Pearce NE, Kriebel D (2004) *Research methods in occupational epidemiology*, 2nd ed. New York: Oxford University Press.
66. Chin J, ed. (2000) *Control of communicable diseases manual. An official report of the American Public Health Association*, 17th ed. Baltimore: United Book Press/Washington, DC: American Public Health Association.
67. Heymann DL, ed. (2008) *Control of communicable diseases manual. An official report of the American Public Health Association*, 19th ed. Baltimore: United Book Press/Washington, DC: American Public Health Association.
68. Clayton D, Hills M (1993) *Statistical models in epidemiology*. New York: Oxford University Press.
69. Cochran AL (1999) *Effectiveness and efficiency: random reflections on health services*. London: Nuffield Provincial Hospitals Trust, 1972. London: British Medical Journal; 1989. London: Royal Society of Medicine Press.
70. Coggon D, Rose G, Barker DJP (1993) *Epidemiology for the uninitiated*. London: BMJ Publishing Group.
71. Doll R (1967) *The prevention of cancer: pointers from epidemiology*. London: Nuffield Provincial Hospitals Trust.
72. Doll R (2008) *The prevention of cancer: pointers from epidemiology*, 2nd ed. Somerset: Aldine Transaction.
73. Doll R, Peto R (1981) *The causes of cancer: quantitative estimates of avoidable risks of cancer in the United States today*. New York: Oxford University Press.
74. Elliott P, Cuzick J, English D, Stern R (1992) *Geographical and environmental epidemiology: Methods for small-area studies*. New York: Oxford University Press.
75. Elston RC, Johnson WD (1987) *Essentials of biostatistics*. Philadelphia, PA: F.A. Davis.
76. Elston RC, Johnson WD (1994) *Essentials of biostatistics*, 2nd ed. Philadelphia, PA: F.A. Davis.
77. Elston R, Olson J, Palmer L, eds. (2002) *Biostatistical genetics and genetic epidemiology*. New York: Wiley.
78. Elwood M (1988) *Causal relationships in medicine: a practical system for critical appraisal*. Oxford: Oxford University Press.
79. Elwood M (1998) *Critical appraisal of epidemiological studies and clinical trials*, 2nd ed. Oxford: Oxford University Press.
80. Elwood M (2007) *Critical appraisal of epidemiological studies and clinical trials*, 3rd ed. Oxford: Oxford University Press.
81. Farmer R, Miller D (1977) *Lecture notes on community medicine*. Oxford: Blackwell Scientific.
82. Farmer R, Miller D (1983) *Lecture notes on epidemiology and community medicine*, 2nd ed. Oxford: Blackwell Scientific.
83. Farmer R, Miller D (1991) *Lecture notes on epidemiology and public health medicine*, 3rd ed. Oxford: Blackwell Scientific.
84. Farmer R, Miller D, Lawrenson R (1996) *Lecture notes on epidemiology and public health medicine*, 4th ed. Oxford: Blackwell Science.
85. Feinstein AR (1985) *Clinical epidemiology. The architecture of clinical research*. Philadelphia, PA: WB Saunders.
86. Feinstein AR (1987) *Clinimetrics*. New Haven: Yale University Press.
87. Fleiss JL (1973) *Statistical methods for rates and proportions*. New York: Wiley.
88. Fleiss JL (1981) *Statistical methods for rates and proportions*, 2nd ed. New York: Wiley.
89. Fleiss JL (2003) *Statistical methods for rates and proportions*, 3rd ed. Hoboken: Wiley-Interscience.
90. Fletcher RH, Fletcher SW, Wagner EH (1982) *Clinical epidemiology. The essentials*, 1st ed. Baltimore, MD: Williams & Wilkins.
91. Fletcher RH, Fletcher SW, Wagner EH (1988) *Clinical epidemiology. The essentials*, 2nd ed. Baltimore, MD: Williams & Wilkins.
92. Fletcher RH, Fletcher SW, Wagner EH (1996) *Clinical epidemiology. The essentials*, 3rd ed. Baltimore, MD: Williams & Wilkins.
93. Fletcher RH, Fletcher SW (2005) *Clinical epidemiology. The essentials*, 4th ed. Baltimore, MD: Wolters, Kluwer, Lippincott, Williams & Wilkins.
94. Fox JP, Hall CE, Elveback LR (1970) *Epidemiology: Man and disease*. New York: Macmillan.
95. Friedman G (1974). *Primer of epidemiology*. New York: McGraw-Hill.
96. Friedman G (1980) *Primer of epidemiology*, 2nd ed. New York: McGraw-Hill.
97. Friedman G (1987) *Primer of epidemiology*, 3rd ed. New York: McGraw-Hill.
98. Friedman G (1994) *Primer of epidemiology*, 4th ed. New York: McGraw-Hill.
99. Friedman G (2004) *Primer of epidemiology*, 5th ed. New York: McGraw-Hill.
100. Friedman LM, Furberg CD, DeMets DL (1981) *Fundamentals of clinical trials*, 1st ed. Boston, MA: PSG.
101. Friedman LM, Furberg CD, DeMets DL (1985) *Fundamentals of clinical trials*, 2nd ed. Littleton: PSG.
102. Friedman LM, Furberg CD, DeMets DL (1996) *Fundamentals of clinical trials*, 3rd ed. St. Louis, MO: Mosby.
103. Friedman LM, Furberg CD, DeMets DL (2010) *Fundamentals of clinical trials*, 4th ed. New York: Springer.
104. Friis RH, Sellers TA (1996) *Epidemiology for public health practice*. Gaithersburg, MD: Aspen.
105. Friis RH, Sellers TA (1999) *Epidemiology for public health practice*, 2nd ed. Gaithersburg, MD: Aspen.
106. Friis RH, Sellers TA (2004) *Epidemiology for public health practice*, 3rd ed. London: Jones & Bartlett.
107. Friis RH, Sellers TA (2009) *Epidemiology for public health practice*, 4th ed. London: Jones & Bartlett.
108. Gordis L (1996) *Epidemiology*, 1st ed. Philadelphia, PA: W.B. Saunders.
109. Gordis L (2000) *Epidemiology*, 2nd ed. Philadelphia, PA: W.B. Saunders.
110. Gordis L (2004) *Epidemiology*, 3rd ed. Amsterdam: Elsevier.
111. Gore SM, Altman DG (1982) *Statistics in practice*. London: British Medical Journal Publications.
112. Gray JAM, Fowler G (1984) *Essentials of preventive medicine*. Oxford: Blackwell.
113. Greenberg RS, Daniels SR, Flanders WD, Eley JW, Boring JR (1993) *Medical epidemiology*. London: Prentice-Hall International.
114. Greenberg RS, Daniels SR, Flanders WD, Eley JW, Boring JR (1996) *Medical epidemiology*, 2nd ed. London: Prentice-Hall International.
115. Greenberg RS, Daniels SR, Flanders WD, Eley JW, Boring JR (2001) *Medical epidemiology*, 3rd ed. London: Lange Medical.
116. Greenberg RS, Daniels SR, Flanders WD, Eley JW, Boring JR (2005) *Medical epidemiology*, 4th ed. London: Lange Medical Books/McGraw-Hill.
117. Greenland S, ed. (1987) *Evolution of epidemiologic ideas. Annotated readings on concepts and methods*. Chestnut Hill, MA: Epidemiology Resources.
118. Greenwood M (1935) *Epidemics and crowd diseases*. London: Williams & Norgate.
119. Gregg MB, ed. (1996) *Field epidemiology*. Oxford: Oxford University Press.
120. Gregg MB, ed. (2002) *Field epidemiology*, 2nd ed. Oxford: Oxford University Press.
121. Gregg MB, ed. (2008) *Field epidemiology*, 3rd ed. Oxford: Oxford University Press.
122. Harkness GA (1995) *Epidemiology in nursing practice*. St Louis, MO: Mosby-Year Book.
123. Hartzema AG, Porta MS, Tilson HH, eds. (1988) *Pharmacoepidemiology. An introduction*. Cincinnati, OH: Harvey Whitney Books.
124. Hartzema AG, Porta MS, Tilson HH, eds. (1991) *Pharmacoepidemiology. An introduction*, 2nd ed. Cincinnati, OH: Harvey Whitney Books.
125. Hartzema AG, Porta MS, Tilson HH, eds. (1998) *Pharmacoepidemiology. An introduction*, 3rd ed. Cincinnati, OH: Harvey Whitney Books.
126. Hartzema AG, Tilson HH, Chan KA, eds. (2008) *Pharmacoepidemiology and therapeutic risk management*, 4th ed. Cincinnati, OH: Harvey Whitney Books.
127. Hennekens CH, Buring JE, Mayrent SL (1987) *Epidemiology in medicine*. Boston: Little, Brown & Co.
128. Hill AB (1977) *Principles of medical statistics*. London: The Lancet.
129. Hill AB (1977) *A short textbook of medical statistics*, 10th ed. London: Hodder & Stoughton.
130. Hill AB, Hill ID (1991) *Bradford Hill's Principles of medical statistics*, 12th ed. London: Edward Arnold.
131. Hill AB (1962) *Statistical methods in clinical and preventive medicine*. London: E and S Livingston.
132. Holford TR (2002) *Multivariate methods in epidemiology*. New York: Oxford University Press.
133. Holland WW, Detels R, Knox G, eds. (1984) *Oxford textbook of public health*. Oxford: Oxford University Press.
134. Holland WW, Detels R, Knox G, eds. (1991) *Oxford textbook of public health*, 2nd ed. Oxford: Oxford University Press.
135. Detels R, McEwen J, Beaglehole T, Tanaka H, eds. (1997) *Oxford textbook of public health*, 3rd ed. Oxford: Oxford University Press.
136. Detels R, McEwen J, Beaglehole T, Tanaka H, eds. (2002) *Oxford textbook of public health*, 4th ed. Oxford: Oxford University Press.
137. Detels R, Beaglehole T, Lansang MA, Gulliford M, eds. (2009) *Oxford textbook of public health*, 5th ed. Oxford: Oxford University Press.
138. Holland WW (1990) *Screening in health care: benefit or bane?* London: Nuffield Provincial Hospitals Trust.
139. Hosmer DW, Lemeshow S (1989) *Applied logistic regression*, 1st ed. New York: Wiley.
140. Hosmer DW, Lemeshow S (2000) *Applied logistic regression*, 2nd ed. New York: John Wiley.
141. Hosmer DW (1999) *Applied survival analysis: regression modeling of time to event data*. New York: Wiley.
142. Hosmer DW (2008) *Applied survival analysis: regression modeling of time to event data*, 2nd ed. New York: Wiley.
143. Hudson TW, Reinhart MA, Rose SD, Stewart GK, eds. (1988) *Clinical preventive medicine: health promotion and disease prevention*. Boston, MA: Little, Brown & Co.
144. Hulka BS, Wilcosky TC, Griffith J, eds. (1990) *Biological markers in epidemiology*. New York: Oxford University Press.
145. Hulley SB, Cummings SR, eds. (1988) *Designing clinical research: an epidemiologic approach*. Baltimore, MD: Williams & Wilkins.

146. Hulley SB, Cummings SR, Browner WS, Grady D, Hearst N, et al., eds. (2001) *Designing clinical research: an epidemiologic approach*, 2nd ed. Philadelphia, PA: Wolters, Kluwer, Lippincott, Williams & Wilkins.
147. Hulley SB, Cummings SR, Browner WS, Grady D, Newman TB, eds. (2007) *Designing clinical research*, 3rd ed. Philadelphia, PA: Wolters, Kluwer, Lippincott, Williams & Wilkins.
148. Jekel JF, Elmore JG, Katz DL (1996) *Epidemiology, biostatistics and preventive medicine*. Philadelphia, PA: WB Saunders Company.
149. Jekel JF, Elmore JG, Katz DL (2001) *Epidemiology, biostatistics and preventive medicine*, 2nd ed. Philadelphia, PA: WB Saunders Company.
150. Jekel JF, Elmore JG, Katz DL (2007) *Epidemiology, biostatistics and preventive medicine*, 3rd ed. Philadelphia, PA: Elsevier Saunders.
151. Jenicek M (1995) *Epidemiology: The logic of modern medicine*. Montreal: Epimed.
152. Jensen O, Parkin DM, MacLennan R, Muir CS, Skeet R (1991) *Cancer registration: principles and methods*. IARC Scientific publications, No. 95. Lyon: International Agency for Research on Cancer.
153. Kahn HA (1983) *An introduction to epidemiologic methods*. New York: Oxford University Press.
154. Kahn HA, Sempos CT (1989) *Statistical methods in epidemiology*. New York: Oxford University Press.
155. Kalbfleisch JD, Prentice RL (1980) *The statistical analysis of failure time data*, 1st ed. New York: Wiley.
156. Kalbfleisch JD, Prentice RL (2002) *The statistical analysis of failure time data*, 2nd ed. New York: Wiley.
157. Kelsey JL, Thompson WD, Evans AS (1986) *Methods in observational epidemiology*, 1st ed. New York: Oxford University Press.
158. Kelsey JL, Whittemore AS, Evans AS, et al. (1996) *Methods in observational epidemiology*, 2nd ed. New York: Oxford University Press.
159. Khoury MJ, Beaty TH, Cohen BH (1993) *Fundamentals of genetic epidemiology*. New York: Oxford University Press.
160. Khoury MJ, Burke W, Thomson E (2000) *Genetics and public health in the 21st century. Using genetic information to improve health and prevent disease*. New York: Oxford University Press.
161. Khoury MJ, Little J, Burke W (2003) *Human genome epidemiology: a scientific foundation for using genetic information to improve health and prevent disease*. New York: Oxford University Press.
162. Khoury MJ, Bedrosian SR, Gwinn M, Higgins JPT, Ioannidis JAP, et al. (2010) *Human genome epidemiology: building the evidence for using genetic information to improve health and prevent disease*, 2nd ed. New York: Oxford University Press.
163. Kleinbaum DG, Kupper LL (1978) *Applied regression analysis and multivariable methods*, 1st ed. North Scituate, MA: Duxbury.
164. Kleinbaum DG, Kupper LL, Muller KE (1988) *Applied regression analysis and multivariable methods*, 2nd ed. Boston: PWS-Kent.
165. Kleinbaum DG, Kupper LL, Muller KE, Nizam A (1998) *Applied regression analysis and multivariable methods*, 3rd ed. Boston: PWS-Kent.
166. Kleinbaum DG, Kupper LL, Muller KE, Nizam A (2007) *Applied regression analysis and multivariable methods*, 4th ed. Pacific Grove, CA: Duxbury.
167. Kleinbaum DG, Kupper LL, Morgenstern H (1982) *Epidemiologic research. Principles and quantitative methods*. Belmont, CA: Lifetime Learning Publications.
168. Kleinbaum DG (1994) *Logistic regression. A self-learning text*, 1st ed. New York: Springer.
169. Kleinbaum DG, Klein M (2002) *Logistic regression. A self-learning text*, 2nd ed. New York: Springer.
170. Kleinbaum DG (1996) *Survival analysis. A self-learning text*. New York: Springer.
171. Kleinbaum DG, Klein M (2005) *Survival analysis. A self-learning text*, 2nd ed. New York: Springer.
172. Last JM, ed. (1983) *A dictionary of epidemiology*, 1st ed. New York: Oxford University Press.
173. Last JM, ed. (1988) *A dictionary of epidemiology*, 2nd ed. New York: Oxford University Press.
174. Last JM, ed. (1995) *A dictionary of epidemiology*, 3rd ed. New York: Oxford University Press.
175. Last JM, ed. (2001) *A dictionary of epidemiology*, 4th ed. New York: Oxford University Press.
176. Lilienfeld AM (1976) *Foundations of epidemiology*. New York: Oxford University Press.
177. Lilienfeld AM, Lilienfeld DE (1980) *Foundations of epidemiology*, 2nd ed. New York: Oxford University Press.
178. Lilienfeld DE, Stolley PD (1994) *Foundations of epidemiology*, 3rd ed. New York: Oxford University Press.
179. Linet MA (1985) *The leukemias. Epidemiologic aspects*. New York: Oxford University Press.
180. MacMahon B, Pugh TF (1960) *Epidemiology. Principles and methods*, 1st ed. Boston, MA: Little, Brown & Co.
181. MacMahon B, Trichopoulos D (1996) *Epidemiology. Principles and methods*, 2nd ed. Boston, MA: Little, Brown & Co.
182. Margetts BM, Nelson M, eds. (1991) *Design concepts in nutritional epidemiology*, 1st ed. Oxford: Oxford University Press.
183. Margetts BM, Nelson M, eds. (1997) *Design concepts in nutritional epidemiology*, 2nd ed. Oxford: Oxford University Press.
184. Marmot M, Elliott P (1992) *Coronary heart disease epidemiology. From aetiology to public health*. Oxford: Oxford University Press.
185. Marmot M, Elliott P (2005) *Coronary heart disease epidemiology. From aetiology to public health*, 2nd ed. Oxford: Oxford University Press.
186. Marmot M, Wilkinson RG (1999) *Social determinants of health*. New York: Oxford University Press.
187. Marmot M, Wilkinson RG (2006) *Social determinants of health*, 2nd ed. New York: Oxford University Press.
188. Mausner JS, Bahn AK (1974) *Epidemiology: an Introductory text*. Philadelphia, PA: Saunders.
189. Mausner JS, Kramer S (1985) *Epidemiology: an Introductory text*, 2nd ed. Philadelphia, PA: Saunders.
190. McDowell I, Newell C, eds. (1987) *Measuring health. A guide to rating scales and questionnaires*, 1st ed. New York: Oxford University Press.
191. McDowell I, Newell C, eds. (1996) *Measuring health. A guide to rating scales and questionnaires*, 2nd ed. New York: Oxford University Press.
192. McDowell I, Newell C, eds. (2006) *Measuring health. A guide to rating scales and questionnaires*, 3rd ed. New York: Oxford University Press.
193. McKeown T (1976) *The role of medicine: dream, mirage or nemesis?* London: The Nuffield Provincial Hospitals Trust.
194. Meinert C (1986) *Clinical trials. Design, conduct, analysis*. New York: Oxford University Press.
195. Miettinen OS (1985) *Theoretical epidemiology*. New York: John Wiley & Sons.
196. Monson RR (1980) *Occupational epidemiology*, 1st ed. Boca Raton: CRC Press.
197. Monson RR (1990) *Occupational epidemiology*, 2nd ed. London: CRC Press.
198. Morrell D, ed. (1988) *Epidemiology in general practice*. Oxford: Oxford University Press.
199. Morris JN (1957) *Uses of epidemiology*, 1st ed. Edinburgh: E&S Livingstone.
200. Morris JN (1964) *Uses of epidemiology*, 2nd ed. Edinburgh: E&S Livingstone.
201. Morris JN (1975) *Uses of epidemiology*, 3rd ed. Edinburgh: Churchill Livingstone.
202. Morrison AS (1985) *Screening in chronic disease*, 1st ed. New York: Oxford University Press.
203. Morrison AS (1992) *Screening in chronic disease*, 2nd ed. New York: Oxford University Press.
204. Morton RF, Hebel JR (1979) *A study guide to epidemiology and biostatistics*. Baltimore, MD: University Park Press.
205. Morton RF, Hebel JR (1984) *A study guide to epidemiology and biostatistics*, 2nd ed. Rockville, MD: Aspen.
206. Morton RF, Hebel JR, McCarter RJ (1990) *A study guide to epidemiology and biostatistics*, 3rd ed. Rockville, MD: Aspen.
207. Morton RF, Hebel JR, McCarter RJ (1996) *A study guide to epidemiology and biostatistics*, 4th ed. Gaithersburg, MD: Aspen.
208. Morton RF, Hebel JR, McCarter RJ (2001) *A study guide to epidemiology and biostatistics*, 5th ed. Gaithersburg, MD: Aspen.
209. Morton RF, Hebel JR, McCarter RJ (2005) *A study guide to epidemiology and biostatistics*, 6th ed. Sudbury: Jones & Bartlett.
210. Murphy EA (1976) *The logic of medicine*. Baltimore, MD: Johns Hopkins University Press.
211. Murphy EA (1997) *The logic of medicine*, 2nd ed. Baltimore, MD: Johns Hopkins University Press.
212. Nelson KE, Williams CM, Graham NMH (2001) *Infectious diseases epidemiology. Theory and practice*, 1st ed. Gaithersburg, MD: Aspen.
213. Nelson KE, Williams CM, Graham NMH (2007) *Infectious diseases epidemiology. Theory and practice*, 2nd ed. London: Jones & Bartlett.
214. Norell SE (1995) *Workbook of epidemiology*. New York: Oxford University Press.
215. Olsen J, Trichopoulos D, eds. (1992) *Teaching epidemiology*. Oxford: Oxford University Press.
216. Olsen J, Saracci R, Trichopoulos D, eds. (2001) *Teaching epidemiology*, 2nd ed. Oxford: Oxford University Press.
217. Olsen J, Saracci R, Trichopoulos D, eds. (2010) *Teaching epidemiology*, 3rd ed. Oxford: Oxford University Press.
218. Page RM, Cole GE, Timmreck TC (1995) *Basic epidemiological methods and biostatistics*. Boston, MA: Jones & Bartlett.
219. Patrick DL, Peach H, eds. (1989) *Disablement in the community*. Oxford: Oxford University Press.
220. Patrick DL, Erickson P (1993) *Health status and health policy. Allocating resources to health care*. New York: Oxford University Press.
221. Pearl J (2000) *Causality: models, reasoning and inference*. New York: Cambridge University Press.
222. Petitti D (1994) *Meta-analysis, decision-analysis, and cost-effectiveness analysis*. New York: Oxford University Press.
223. Petitti D (2000) *Meta-analysis, decision-analysis, and cost-effectiveness analysis*. New York: Oxford University Press.
224. Pocock SJ (1983) *Clinical Trials. A practical approach*. Chichester: John Wiley & Sons.
225. Pocock SJ (2002) *Clinical Trials. A practical approach*. Chichester: John Wiley & Sons.
226. Polgar S, Thomas SA (1988) *Introduction to research in the health sciences*. London: Churchill Livingstone.
227. Prince M, Stewart R, Ford T, Hotof M, eds. (2003) *Practical psychiatric epidemiology*. New York: Oxford University Press.

228. Rebbeck TR, Ambrosone CB, Shields PG, eds. (2008) *Molecular epidemiology: applications in cancer and other human diseases*. New York: Informa.
229. Roberts CJ (1977) *Epidemiology for clinicians*. Tunbridge Wells: Pitman.
230. Robertson L (1992) *Injury epidemiology*. New York: Oxford University Press.
231. Robertson L (1998) *Injury epidemiology. Research and Control Strategies*, 2nd ed. New York: Oxford University Press.
232. Robertson L (2007) *Injury epidemiology. Research and control strategies*, 3rd ed. New York: Oxford University Press.
233. Rose G (1992) *The strategy of preventive medicine*. Oxford: Oxford University Press.
234. Rosen G (1958) *A history of public health*. New York: MD Publications.
235. Rosen G (1993) *A history of public health*, 2nd ed. Baltimore, MD: Johns Hopkins University Press.
236. Rose GA, Blackburn H, Gillum RF, Prineas RJ (1968) *Cardiovascular Survey Methods*. WHO Monograph Series. Geneva: World Health Organization.
237. Rose GA, Blackburn H, Gillum RF, Prineas RJ (1982) *Cardiovascular survey methods*, 2nd ed. Geneva: World Health Organization.
238. Luepker RV, Evans A, McKeigue P, et al. (2004) *Cardiovascular survey methods*, 3rd ed. Geneva: World Health Organization.
239. Rosenau MJ (193) *Preventive medicine and hygiene*. New York: D. Appleton & Co.
240. Maxcy KF, ed. (1951) *Rosenau Preventive medicine and hygiene*, 7th ed. New York: D. Appleton-Century-Crofts.
241. Sartwell PE, ed. (1973) *Maxcy-Rosenau Preventive medicine and public health*, 10th ed. New York: D. Appleton & Co.
242. Last JM, ed. (1980) *Maxcy-Rosenau Public health and preventive medicine*, 11th ed. New York: D. Appleton & Co.
243. Last JM, Wallace RB, eds. (1992) *Maxcy-Rosenau-Last Public health and preventive medicine*, 13th ed. London: Prentice-Hall.
244. Wallace RB, ed. (2008) *Maxcy-Rosenau-Last Public health and preventive medicine*, 15th ed. New York: McGraw-Hill.
245. Rosner B (1982) *Fundamentals of biostatistics*. Boston, MA: Duxbury.
246. Rosner B (1986) *Fundamentals of biostatistics*, 2nd ed. Boston, MA: Duxbury.
247. Rosner B (1990) *Fundamentals of biostatistics*, 3rd ed. Boston, MA: PWS-Kent.
248. Rosner B (1995) *Fundamentals of biostatistics*, 4th ed. London: Duxbury.
249. Rosner B (2000) *Fundamentals of biostatistics*, 5th ed. London: Duxbury.
250. Rothman KJ (1986) *Modern epidemiology*, 1st ed. Boston, MA: Little, Brown & Co.
251. Rothman KJ, Greenland S, eds. (1998) *Modern epidemiology*, 2nd ed. Philadelphia, PA: Lippincott-Raven.
252. Rothman KJ, Greenland S, Lash TL, eds. (2008) *Modern epidemiology*, 3rd ed. Philadelphia, PA: Lippincott-Raven.
253. Rothman KJ, ed. (1988) *Causal inference*. Chestnut Hill, MA: Epidemiology Resources.
254. Rothman KJ (2002) *Epidemiology: an introduction*. New York: Oxford University Press.
255. Sackett DL, Haynes RB, Tugwell P (1985) *Clinical epidemiology. A basic science for clinical medicine*, 1st ed. Boston, MA: Little, Brown & Co.
256. Sackett DL, Haynes RB, Guyatt GH, Tugwell P (1991) *Clinical epidemiology. A basic science for clinical medicine*, 2nd ed. Boston, MA: Little, Brown & Co.
257. Haynes RB, Sackett DL, Guyatt GH, Tugwell P (2005) *Clinical epidemiology. How to do clinical practice research*, 3rd ed. Philadelphia, PA: Lippincott, Williams & Wilkins.
258. Sackett DL, Richardson WS, Rosenberg W, Haynes RB (1997) *Evidence-based medicine: how to practice and teach EBM*, 1st ed. Edinburgh: Churchill Livingstone.
259. Sackett DL, Straus S, Richardson WS, Rosenberg W, Haynes RB (2000) *Evidence-based medicine: how to practice and teach EBM*, 2nd ed. Edinburgh: Churchill Livingstone.
260. Straus S, Richardson WS, Glasziou P, Haynes RB (2005) *Evidence-based medicine: how to practice and teach EBM*, 3rd ed. Edinburgh: Elsevier Churchill Livingstone.
261. Schlesselman JJ, Stolley PD (1982) *Case control studies. Design, conduct, analysis*. New York: Oxford University Press.
262. Schottenfeld D (1975) *Cancer epidemiology and prevention*, 1st ed. Springfield, IL: Charles C. Thomas.
263. Schottenfeld D, Fraumeni FJ Jr, eds. (1982) *Cancer epidemiology and prevention*, 1st ed. London: Saunders.
264. Schottenfeld D, Fraumeni FJ Jr, eds. (1996) *Cancer epidemiology and prevention*, 2nd ed. New York: Oxford University Press.
265. Schottenfeld D, Fraumeni FJ Jr, eds. (2006) *Cancer epidemiology and prevention*, 3rd ed. Oxford: Oxford University Press.
266. Schulte PA, Perera F, eds. (1993) *Molecular epidemiology. Principles and practice*. Orlando, FL: Academic Press.
267. Schuman SH (1986) *Practice-based epidemiology*. New York: Gordon & Breach Science Publishers.
268. Silman AJ (1995) *Epidemiological studies: a practical guide*. Cambridge: Cambridge University Press.
269. Silman AJ, MacFarlane GJ (2002) *Epidemiological studies: a practical guide*, 2nd ed. Cambridge: Cambridge University Press.
270. Starfield B, McHugh PR, Murphy EA (1985) *The effectiveness of medical care: validating clinical wisdom*. London: Johns Hopkins University Press.
271. Steenland K, ed. (1993) *Case studies in occupational epidemiology*. New York: Oxford University Press.
272. Stolley PD, Laskey T (1995) *Investigating disease patterns: The science of epidemiology*. New York: Scientific America Library.
273. Streiner DL, Norman GR (1989) *Health measurement scales. A practical guide to their development and use*. Oxford: Oxford University Press.
274. Streiner DL, Norman GR (1995) *Health measurement scales. A practical guide to their development and use*, 2nd ed. Oxford: Oxford University Press.
275. Streiner DL, Norman GR (2003) *Health measurement scales. A practical guide to their development and use*, 3rd ed. Oxford: Oxford University Press.
276. Streiner DL, Norman GR (2008) *Health measurement scales. A practical guide to their development and use*, 4th ed. Oxford: Oxford University Press.
277. Strom BL, ed. (1989) *Pharmacoepidemiology*, 1st ed. New York: Churchill Livingstone.
278. Strom BL, ed. (1994) *Pharmacoepidemiology*, 2nd ed. Chichester: John Wiley & Sons.
279. Strom BL, ed. (2000) *Pharmacoepidemiology*, 3rd ed. Chichester: John Wiley & Sons.
280. Strom BL, ed. (2005) *Pharmacoepidemiology*, 4th ed. Chichester: John Wiley & Sons.
281. Sudman S, Bradburn NM (1982) *Asking questions. A practical guide to questionnaire design*, 1st ed. San Francisco: Jossey-Bass.
282. Bradburn NM, Sudman S, Wansink B (2004) *Asking questions: the definitive guide to questionnaire design*, 2nd ed. San Francisco: Jossey-Bass.
283. Susser M (1973) *Causal thinking in the health sciences*. New York: Oxford University Press.
284. Sydenstricker E (1933) *Health and environment*. New York: McGraw-Hill.
285. Sydenstricker E (1972) *Health and environment*, 2nd ed. New York: Arno Press.
286. Szklo M, Nieto FJ (2000) *Epidemiology. Beyond the basics*. Gaithersburg, MD: Aspen.
287. Teutsch SM, Churchill RE, eds. (1994) *Principles and practice of public health surveillance*. New York: Oxford University Press.
288. Teutsch SM, Churchill RE, eds. (2000) *Principles and practice of public health surveillance*, 2nd ed. New York: Oxford University Press.
289. Timmreck TC (1994) *An introduction to epidemiology*. Boston: Jones & Bartlett.
290. Timmreck TC (1998) *An introduction to epidemiology*, 2nd ed. Sudbury: Jones & Bartlett.
291. Timmreck TC (2002) *An introduction to epidemiology*, 3rd ed. Boston, MA: Jones & Bartlett.
292. Toniolo P, Boffetta P, Shuker DEG, eds. (1997) *Application of biomarkers in cancer epidemiology*. IARC Scientific publications, No. 142. Lyon: International Agency for Research on Cancer.
293. Townsend P, Davidson N (1982) *Inequalities in health. The Black report*. Harmondsworth: Penguin.
294. Unwin N, Carr S, Leeson J (1997) *An introductory study guide to public health and epidemiology*. Buckingham: Open University Press.
295. Vineis P, Malats N, Lang M, d'Errico A, Caporaso N, et al, eds. (1999) *Metabolic polymorphisms and susceptibility to cancer*. IARC Scientific publications, No. 148. Lyon: International Agency for Research on Cancer.
296. Waning B, Montagne M (2000) *Pharmacoepidemiology: Principles and practice*. New York: McGraw-Hill Medical.
297. Weiss N (1986) *Clinical epidemiology: The study of the outcome of illness*, 1st ed. New York: Oxford University Press.
298. Weiss N (1996) *Clinical epidemiology: The study of the outcome of illness*, 2nd ed. New York: Oxford University Press.
299. White KL, Henderson M, eds. (1976) *Epidemiology as a fundamental science: its uses in health services planning, administration and evaluation*. New York: Oxford University Press.
300. White KL, Henderson M, eds. (1980) *Epidemiology as a fundamental science: its uses in health services planning, administration and evaluation*. New York: Oxford University Press.
301. Wild C, Vineis P, Garte S, eds. (2008) *Molecular epidemiology of chronic diseases*. Chichester: John Wiley & Sons.
302. Willett W (1990) *Nutritional epidemiology*, 1st ed. Oxford: Oxford University Press.
303. Willett W (1998) *Nutritional epidemiology*, 2nd ed. Oxford: Oxford University Press.
304. Winklestein W Jr, French FE, Lane JM, eds. (1970) *Basic readings in epidemiology*. New York: MSS Educational Pub. Co.
305. Thomson Reuters (formerly ISI). Web of Knowledge. Available: <http://www.isiwebofknowledge.com> Accessed 20 March 2013.
306. Butler L, Visser MS (2006) Extending citation analysis to non-source items. *Scientometrics* 66: 327–343.
307. Vandenbroucke JP (1988) Is 'The Causes of Cancer': a miasma theory for the end of the 20th-century? *Int J Epidemiol* 17: 708–709.
308. Kaufman JS, Poole C (2000) Looking back on 'Causal thinking in the health sciences'. *Annu Rev Public Health* 21: 101–119.
309. Kleinman A (1988) *The illness narratives. Suffering, healing and the human condition*. New York: Basic Books.
310. Fuchs VR (1998) *Who shall live? Health, economics, and social choice*. New York: Basic Books; 1974. River Edge, NJ: World Scientific Publishing.
311. Knowles JH (1977) *Doing better and feeling worse. Health in the United States*. New York: Norton.

312. Garfield E (1972) Citation analysis as a tool in journal evaluation. *Science* 178: 471–479.
313. Garfield E (1985) Uses and misuses of citation frequency. *Current Contents* 43: 3–9.
314. Seglen PO (1992) How representative is the journal impact factor? *Research Evaluation* 2: 143–149.
315. Porta M (1996) The bibliographic 'impact factor' of ISI, Inc.: how relevant is it really for public health journals? *J Epidemiol Community Health* 50: 606–610.
316. Tatsioni A, Bonitsis NG, Ioannidis JPA (2007) Persistence of contradicted claims in the literature. *JAMA* 298: 2517–2526.
317. Evans JA (2008) Electronic publication and the narrowing of science and scholarship. *Science* 321: 395–399.
318. Ioannidis JP (2006) Concentration of the most-cited papers in the scientific literature: analysis of journal ecosystems. *PLoS One* 1: e5.
319. Larivière V, Gingras Y, Archambault E (2009) The decline in the concentration of citations, 1990–2007. *J Am Soc Inf Sci Technol* 60: 858–862.
320. Vandenbroucke JP (1998) Clinical investigation in the 20th century: the ascendancy of numerical reasoning. *Lancet* 352 (Suppl 2): 12–16.
321. Vandenbroucke JP (1998) Medical journals and the shaping of medical knowledge. *Lancet* 352: 2001–2006.
322. Porta M, Álvarez-Dardet C (1998) Epidemiology: bridges over (and across) roaring levels. *J Epidemiol Community Health* 52: 605.
323. Bolúmar F, Porta M (2004) Epidemiologic methods: beyond clinical medicine, beyond epidemiology. *Eur J Epidemiol* 19: 733–735.
324. Garfield E (1987) The 101 most-cited papers from the *British Medical Journal* highlight the important role of epidemiology in medicine. *Current Contents* 7: 3–11.
325. Thomson Reuters. Book Citation Index. Available: [http://wokinfo.com/products\\_tools/multidisciplinary/bookcitationindex/](http://wokinfo.com/products_tools/multidisciplinary/bookcitationindex/). Accessed 20 March 2013.
326. Adams J, Testa J (2011) Thomson Reuters Book Citation Index. In: Noyons E, Ngulube P, Leta J. Proceedings of the 13th Conference of the International Society for Scientometrics and Informetrics (ISSI) (Durban, South Africa, July 4–7, 2011), Vols. 1 and 2. Proceedings of the International Conference on Scientometrics and Informetrics. pp. 13–18.
327. Mantel N, Haenszel W (1959) Statistical aspects of the analysis of data from retrospective studies of disease. *J Natl Cancer Inst* 22: 719–748.
328. Susser M, Watson W, Hopper K, eds. (1985) *Sociology in medicine*, 3rd ed. New York: Oxford University Press.
329. Susser M (1987) *Epidemiology, health and society. Selected papers by Mervyn Susser*. New York: Oxford University Press.
330. Susser M, Stein Z (2009) *Eras in epidemiology: the evolution of ideas*. New York: Oxford University Press.
331. Porta M (2006) Things that kept coming to mind while thinking through Susser's South African memoir. *J Epidemiol Community Health* 60: 559–561.
332. Krieger N (2007) Ways of asking and ways of living: reflections on the 50th anniversary of Morris' ever-useful *Uses of Epidemiology*. *Int J Epidemiol* 36: 1173–1180.
333. Black N, Neuhauser D (2006) Books that have changed health services and health care policy. *J Health Serv Res Policy* 11: 180–183.
334. Hill AB (1965) Environment and disease – association or causation. *Proc Royal Soc Med London* 58: 295–300.
335. Miettinen O (1976) Estimability and estimation in case-referent studies. *Am J Epidemiol* 103: 226–235.
336. Cornfield J (1951) A method of estimating comparative rates from clinical data – applications to cancer of the lung, breast, and cervix. *J Natl Cancer Inst* 11: 1269–1275.
337. Doll R, Peto R (1981) The causes of cancer – quantitative estimates of avoidable risks of cancer in the United States today. *J Natl Cancer Inst* 66: 1191–1308.
338. Peter J (2008) Testing the calculation of a realistic h-index in Google Scholar, Scopus, and Web of Science for F. W. Lancaster. *Library Trends* 56: 784–815.
339. Willett WC, Sampson L, Stampfer MJ, Rosner B, Bain C, et al. (1985) Reproducibility and validity of a semiquantitative food frequency questionnaire. *Am J Epidemiol* 122: 51–65.
340. St Leger AS, Cochrane AL, Moore F (1979) Factors associated with cardiac mortality in developed countries with particular reference to the consumption of wine. *Lancet* 1: 1017–1020.
341. Elwood PC, Cochrane AL, Burr ML, Sweetnam PM, Williams G, et al. (1974) A randomized controlled trial of acetyl salicylic acid in the secondary prevention of mortality from myocardial infarction. *Br Med J* 1: 436–440.
342. Rose G (1985) Sick individuals and sick populations. *Int J Epidemiol* 14: 32–38.
